# Supplementary material for: Distinct genetic pathways define pre-malignant versus compensatory clonal hematopoiesis in Shwachman-Diamond syndrome
Source: PubMed Central journal article supplement (PMC7910481; doi:10.1038/s41467-021-21588-4), 2021-02-26
Supplement: 41467_2021_21588_MOESM1_ESM.pdf [file 41467_2021_21588_MOESM1_ESM.pdf]

## Supplementary Information

### Supplementary Figure 1

a

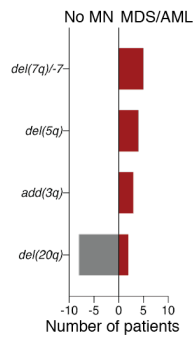

**Supplementary Figure 1: Recurrent structural alterations found in patient cohort with or without myeloid neoplasm.** Shown are the indicated somatic copy number alterations in the exome cohort without (grey bar) or with (red bars) myeloid neoplasm.

**Supplementary Figure 2**

a

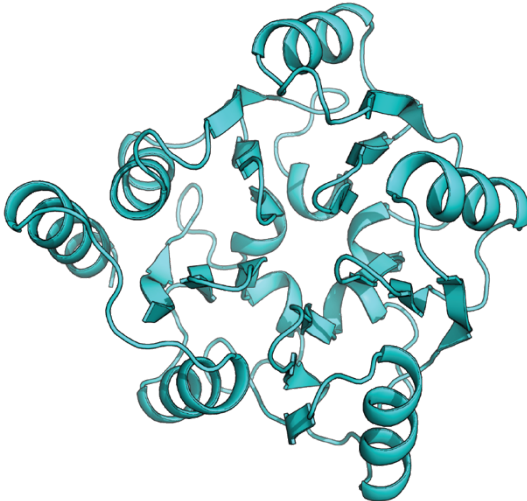

**Supplementary Figure 2: Homology model of human EIF6 protein.** Propeller like structural model of human EIF6 with five conserved  $\beta\beta\alpha\beta$  motifs.

### Supplementary Figure 3

**a**

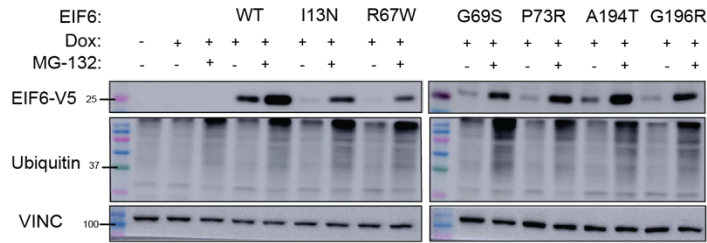

**b**

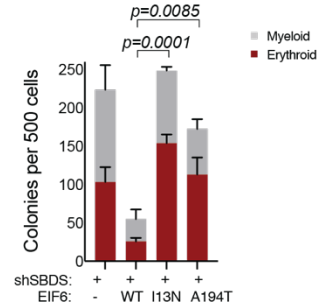

**c**

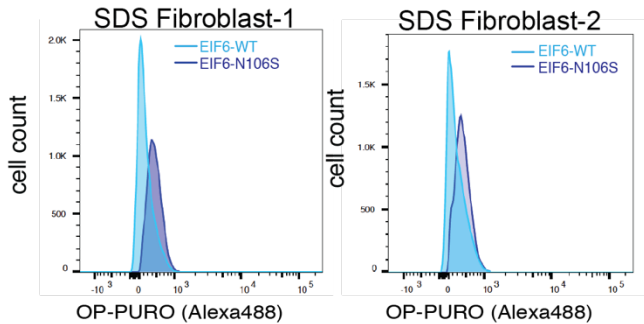

**d**

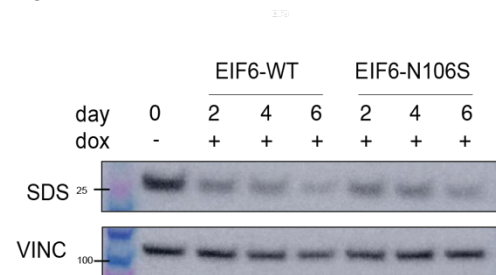

**Supplementary Figure 3: Mutant EIF6 protein degradation is proteasome dependent and loss of function mutations lead to increased colony formation and translation.** **A**, Immunoblot of K562 cells expressing doxycycline-inducible V5-tagged wild type EIF6 (WT) or mutant EIF6 cDNAs and treated with MG-132 proteasome inhibitor as indicated. The blots were probed with antibodies against the V5 tag, ubiquitin, or GAPDH. Ubiquitin serves as control for MG-132 activity and GAPDH as loading control. Data shown is representative of 3 independent experiments. **B**, Quantification of colony forming units from sorted CD34+ transduced with shSBDS-GFP together with the indicated EIF6 expression vectors (EIF6-WT-RFP or EIF6-I13N-RFP or EIF6-A194T-RFP) plated in triplicate. Shown is representative of 3 independent experiments. **C**, OP-Puro incorporation in two different primary SDS patient-derived fibroblast cell lines transduced with cDNAs of EIF6-WT or EIF6-N106S. Error bars represent the mean +/- standard deviation. **D**, Western blot of K562 cells expressing inducible shRNAs targeting SBDS at timepoints indicated. Data shown is representative of 3 independent experiments.

### Supplementary Figure 4

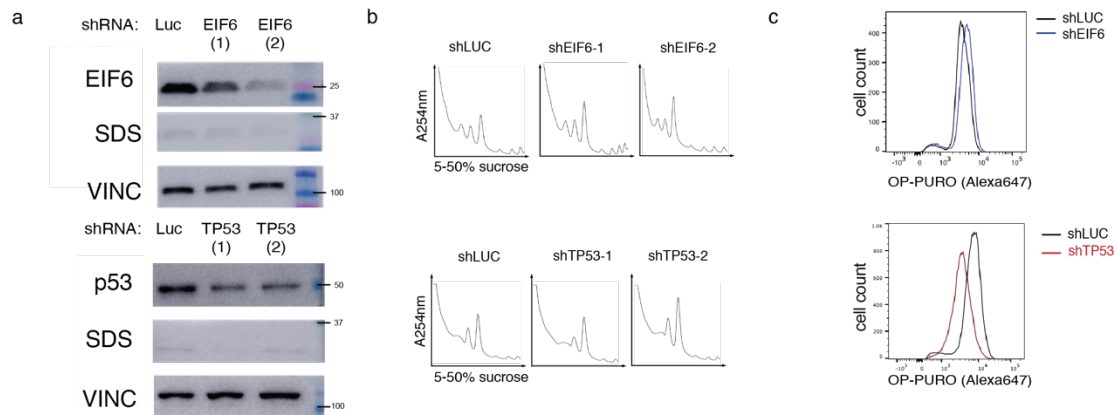

**Supplementary Figure 4: Knockdown or mutations in *EIF6* lead to improved ribosome maturation, translation and colony formation. A**, EIF6, SBDS and vinculin immunoblots of primary SDS patient-derived fibroblasts transduced with shRNAs targeting luciferase control, EIF6 (top panel) or TP53 (bottom panel). Data shown is representative of 3 independent experiments. **B**, Polysome profiles of cells in panel A. **C**, Biological replicate of data shown in Figure 3B. OP-Puro incorporation in primary SDS patient-derived fibroblasts transduced with shRNAs targeting luciferase, EIF6 (upper panel) or TP53 (lower panel).

## Supplementary Figure 5

### a. CD34+ cell sorting gating strategy

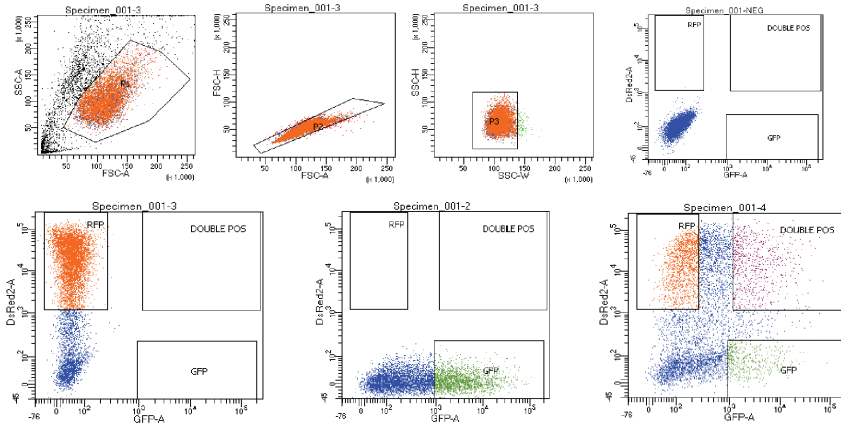

### b. Growth Competition Gating Strategy

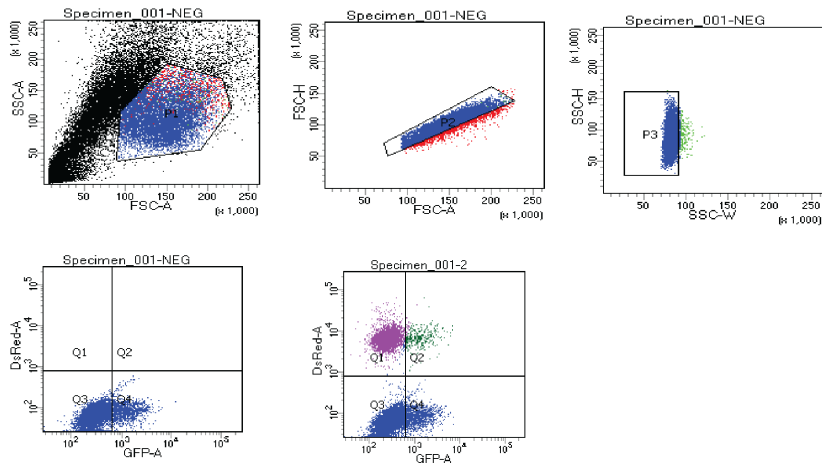

### c. OP-PURO Gating Strategy

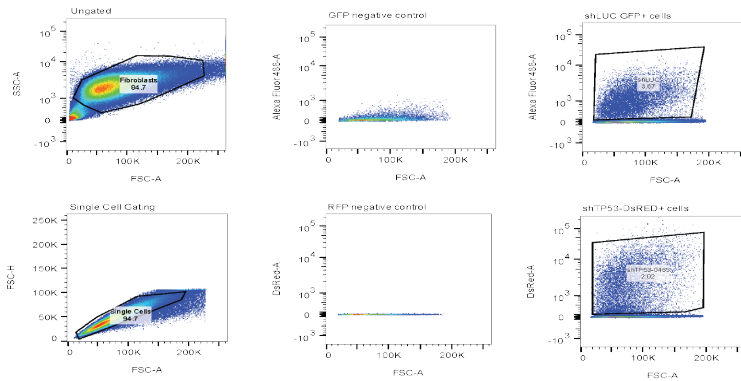

**Supplementary Figure 5: Summary of flow cytometry gating strategies. A,** Gating strategy for CD34 cells. **B,** Gating strategy for growth competition experiments. **C.** Gating strategy for OP-PURO.

**Supplementary Table 1: Whole Exome/Discovery Sequencing Cohort:**

|        |        |         |
|--------|--------|---------|
| SDS-10 | SDS-48 | SDS-78  |
| SDS-11 | SDS-49 | SDS-84  |
| SDS-13 | SDS-57 | SDS-86  |
| SDS-14 | SDS-62 | SDS-87  |
| SDS-18 | SDS-63 | SDS-89  |
| SDS-21 | SDS-65 | SDS-92  |
| SDS-36 | SDS-71 | SDS-95  |
| SDS-39 | SDS-72 | SDS-98  |
| SDS-40 | SDS-75 | SDS-99  |
| SDS-47 | SDS-77 | SDS-102 |

**Supplementary table 2: Targeted sequencing gene list and coordinates.**

| Chromosome | position start | position stop | Gene ID   |
|------------|----------------|---------------|-----------|
| chr1       | 1737908        | 1737983       | gnb1_e6   |
| chr1       | 1747189        | 1747308       | gnb1_e5   |
| chr1       | 36931638       | 36931807      | csf3r_e18 |
| chr1       | 36931952       | 36932515      | csf3r_e17 |
| chr1       | 36932825       | 36932918      | csf3r_e16 |
| chr1       | 36933153       | 36933258      | csf3r_e15 |
| chr1       | 36933417       | 36933569      | csf3r_e14 |
| chr1       | 43814928       | 43815036      | MPL_e10   |
| chr1       | 115251145      | 115251285     | NRAS      |
| chr1       | 115252179      | 115252359     | NRAS      |
| chr1       | 115256410      | 115256609     | NRAS      |
| chr1       | 115258660      | 115258791     | NRAS      |
| chr1       | 155870168      | 155870419     | RIT1      |
| chr1       | 155874091      | 155874303     | RIT1      |
| chr1       | 155874383      | 155874411     | RIT1      |
| chr1       | 155874511      | 155874605     | RIT1      |
| chr1       | 155880230      | 155880307     | RIT1      |
| chr1       | 155880436      | 155880605     | RIT1      |
| chr1       | 155880658      | 155880686     | RIT1      |
| chr10      | 112327564      | 112327599     | SMC3      |
| chr10      | 112328685      | 112328781     | SMC3      |
| chr10      | 112333454      | 112333513     | SMC3      |
| chr10      | 112335083      | 112335171     | SMC3      |
| chr10      | 112337168      | 112337260     | SMC3      |
| chr10      | 112337582      | 112337682     | SMC3      |
| chr10      | 112338375      | 112338474     | SMC3      |
| chr10      | 112340651      | 112340789     | SMC3      |
| chr10      | 112341670      | 112341866     | SMC3      |
| chr10      | 112342309      | 112342410     | SMC3      |
| chr10      | 112343131      | 112343316     | SMC3      |
| chr10      | 112343588      | 112343730     | SMC3      |
| chr10      | 112343930      | 112344164     | SMC3      |
| chr10      | 112349352      | 112349476     | SMC3      |
| chr10      | 112349639      | 112349759     | SMC3      |
| chr10      | 112350159      | 112350340     | SMC3      |
| chr10      | 112350738      | 112350900     | SMC3      |
| chr10      | 112352820      | 112352991     | SMC3      |
| chr10      | 112356145      | 112356318     | SMC3      |
| chr10      | 112357886      | 112358058     | SMC3      |
| chr10      | 112359401      | 112359580     | SMC3      |
| chr10      | 112360186      | 112360314     | SMC3      |
| chr10      | 112360769      | 112360898     | SMC3      |
| chr10      | 112361384      | 112361652     | SMC3      |

|       |           |           |      |
|-------|-----------|-----------|------|
| chr10 | 112361713 | 112361946 | SMC3 |
| chr10 | 112362221 | 112362433 | SMC3 |
| chr10 | 112362572 | 112362770 | SMC3 |
| chr10 | 112362931 | 112363058 | SMC3 |
| chr10 | 112363978 | 112364070 | SMC3 |
| chr11 | 32410593  | 32410735  | WT1  |
| chr11 | 32413507  | 32413620  | WT1  |
| chr11 | 32414201  | 32414311  | WT1  |
| chr11 | 32417792  | 32417963  | WT1  |
| chr11 | 32421483  | 32421600  | WT1  |
| chr11 | 32438025  | 32438096  | WT1  |
| chr11 | 32439108  | 32439210  | WT1  |
| chr11 | 32449491  | 32449614  | WT1  |
| chr11 | 32450032  | 32450175  | WT1  |
| chr11 | 32452065  | 32452095  | WT1  |
| chr11 | 32456235  | 32456901  | WT1  |
| chr11 | 108098341 | 108098433 | ATM  |
| chr11 | 108098492 | 108098625 | ATM  |
| chr11 | 108099894 | 108100060 | ATM  |
| chr11 | 108106386 | 108106571 | ATM  |
| chr11 | 108114669 | 108114855 | ATM  |
| chr11 | 108115504 | 108115763 | ATM  |
| chr11 | 108117680 | 108117864 | ATM  |
| chr11 | 108119649 | 108119839 | ATM  |
| chr11 | 108121417 | 108121809 | ATM  |
| chr11 | 108122553 | 108122768 | ATM  |
| chr11 | 108123533 | 108123649 | ATM  |
| chr11 | 108124530 | 108124776 | ATM  |
| chr11 | 108126931 | 108127077 | ATM  |
| chr11 | 108128197 | 108128343 | ATM  |
| chr11 | 108129702 | 108129812 | ATM  |
| chr11 | 108137887 | 108138079 | ATM  |
| chr11 | 108139126 | 108139346 | ATM  |
| chr11 | 108141780 | 108141883 | ATM  |
| chr11 | 108141967 | 108142143 | ATM  |
| chr11 | 108143248 | 108143344 | ATM  |
| chr11 | 108143438 | 108143589 | ATM  |
| chr11 | 108150207 | 108150345 | ATM  |
| chr11 | 108151711 | 108151905 | ATM  |
| chr11 | 108153426 | 108153616 | ATM  |
| chr11 | 108154943 | 108155210 | ATM  |
| chr11 | 108158316 | 108158452 | ATM  |
| chr11 | 108159693 | 108159840 | ATM  |
| chr11 | 108160318 | 108160538 | ATM  |
| chr11 | 108163335 | 108163530 | ATM  |



|       |           |           |        |
|-------|-----------|-----------|--------|
| chr11 | 108164029 | 108164214 | ATM    |
| chr11 | 108165643 | 108165796 | ATM    |
| chr11 | 108168003 | 108168119 | ATM    |
| chr11 | 108170430 | 108170622 | ATM    |
| chr11 | 108172364 | 108172526 | ATM    |
| chr11 | 108173569 | 108173766 | ATM    |
| chr11 | 108175391 | 108175589 | ATM    |
| chr11 | 108178613 | 108178721 | ATM    |
| chr11 | 108180876 | 108181052 | ATM    |
| chr11 | 108183127 | 108183235 | ATM    |
| chr11 | 108186539 | 108186648 | ATM    |
| chr11 | 108186727 | 108186850 | ATM    |
| chr11 | 108188089 | 108188258 | ATM    |
| chr11 | 108190670 | 108190795 | ATM    |
| chr11 | 108192017 | 108192157 | ATM    |
| chr11 | 108196026 | 108196281 | ATM    |
| chr11 | 108196774 | 108196962 | ATM    |
| chr11 | 108198361 | 108198495 | ATM    |
| chr11 | 108199737 | 108199975 | ATM    |
| chr11 | 108200930 | 108201158 | ATM    |
| chr11 | 108202160 | 108202294 | ATM    |
| chr11 | 108202595 | 108202774 | ATM    |
| chr11 | 108203478 | 108203637 | ATM    |
| chr11 | 108204602 | 108204705 | ATM    |
| chr11 | 108205685 | 108205846 | ATM    |
| chr11 | 108206561 | 108206698 | ATM    |
| chr11 | 108213938 | 108214108 | ATM    |
| chr11 | 108216459 | 108216645 | ATM    |
| chr11 | 108217995 | 108218102 | ATM    |
| chr11 | 108224482 | 108224617 | ATM    |
| chr11 | 108225527 | 108225611 | ATM    |
| chr11 | 108235798 | 108235955 | ATM    |
| chr11 | 108236041 | 108236245 | ATM    |
| chr11 | 119148461 | 119148560 | cbl_e7 |
| chr11 | 119148870 | 119149013 | cbl_e8 |
| chr11 | 119149214 | 119149429 | cbl_e9 |
| chr12 | 11803051  | 11803104  | ETV6   |
| chr12 | 11905373  | 11905523  | ETV6   |
| chr12 | 11992063  | 11992248  | ETV6   |
| chr12 | 11993384  | 11993427  | ETV6   |
| chr12 | 12006350  | 12006505  | ETV6   |
| chr12 | 12022347  | 12022913  | ETV6   |
| chr12 | 12037368  | 12037531  | ETV6   |
| chr12 | 12038849  | 12038970  | ETV6   |
| chr12 | 12043864  | 12043990  | ETV6   |

|       |           |           |             |
|-------|-----------|-----------|-------------|
| chr12 | 22811942  | 22812094  | etnk1_e3    |
| chr12 | 25362718  | 25362855  | KRAS        |
| chr12 | 25368364  | 25368504  | KRAS        |
| chr12 | 25378537  | 25378717  | KRAS        |
| chr12 | 25380157  | 25380356  | KRAS        |
| chr12 | 25398197  | 25398328  | KRAS        |
| chr12 | 111855939 | 111856691 | SH2B3       |
| chr12 | 111884546 | 111884668 | SH2B3       |
| chr12 | 111884735 | 111884847 | SH2B3       |
| chr12 | 111884918 | 111885033 | SH2B3       |
| chr12 | 111885123 | 111885358 | SH2B3       |
| chr12 | 111885449 | 111885641 | SH2B3       |
| chr12 | 111885776 | 111886116 | SH2B3       |
| chr12 | 112856905 | 112856939 | PTPN11      |
| chr12 | 112884069 | 112884212 | PTPN11      |
| chr12 | 112888111 | 112888326 | PTPN11      |
| chr12 | 112890988 | 112891201 | PTPN11      |
| chr12 | 112892357 | 112892494 | PTPN11      |
| chr12 | 112893743 | 112893877 | PTPN11      |
| chr12 | 112910737 | 112910854 | PTPN11      |
| chr12 | 112915444 | 112915544 | PTPN11      |
| chr12 | 112915650 | 112915829 | PTPN11      |
| chr12 | 112919867 | 112920019 | PTPN11      |
| chr12 | 112924268 | 112924447 | PTPN11      |
| chr12 | 112926236 | 112926324 | PTPN11      |
| chr12 | 112926817 | 112926989 | PTPN11      |
| chr12 | 112939937 | 112940070 | PTPN11      |
| chr12 | 112942488 | 112942578 | PTPN11      |
| chr13 | 28592598  | 28592732  | flt3_e20    |
| chr13 | 28601219  | 28601384  | flt3_e17    |
| chr13 | 28602309  | 28602431  | flt3_e16    |
| chr13 | 28608018  | 28608357  | flt3_e14_15 |
| chr13 | 33222899  | 33223027  | PDS5B       |
| chr13 | 33225930  | 33226154  | PDS5B       |
| chr13 | 33232365  | 33232472  | PDS5B       |
| chr13 | 33232560  | 33232678  | PDS5B       |
| chr13 | 33233280  | 33233427  | PDS5B       |
| chr13 | 33241890  | 33241991  | PDS5B       |
| chr13 | 33247342  | 33247503  | PDS5B       |
| chr13 | 33249970  | 33250106  | PDS5B       |
| chr13 | 33252961  | 33253076  | PDS5B       |
| chr13 | 33258004  | 33258170  | PDS5B       |
| chr13 | 33261260  | 33261432  | PDS5B       |
| chr13 | 33262582  | 33262716  | PDS5B       |
| chr13 | 33268349  | 33268451  | PDS5B       |

|       |          |          |       |
|-------|----------|----------|-------|
| chr13 | 33270980 | 33271049 | PDS5B |
| chr13 | 33273856 | 33274016 | PDS5B |
| chr13 | 33275449 | 33275585 | PDS5B |
| chr13 | 33281060 | 33281186 | PDS5B |
| chr13 | 33284072 | 33284253 | PDS5B |
| chr13 | 33306227 | 33306371 | PDS5B |
| chr13 | 33309298 | 33309477 | PDS5B |
| chr13 | 33315207 | 33315296 | PDS5B |
| chr13 | 33316718 | 33316875 | PDS5B |
| chr13 | 33320104 | 33320248 | PDS5B |
| chr13 | 33327459 | 33327684 | PDS5B |
| chr13 | 33329969 | 33330104 | PDS5B |
| chr13 | 33332214 | 33332367 | PDS5B |
| chr13 | 33332661 | 33332801 | PDS5B |
| chr13 | 33333755 | 33333838 | PDS5B |
| chr13 | 33334702 | 33334868 | PDS5B |
| chr13 | 33338616 | 33338742 | PDS5B |
| chr13 | 33344248 | 33344708 | PDS5B |
| chr13 | 33344781 | 33344913 | PDS5B |
| chr13 | 33347316 | 33347472 | PDS5B |
| chr13 | 33349144 | 33349200 | PDS5B |
| chr15 | 90631808 | 90631989 | IDH2  |
| chr17 | 1553942  | 1554260  | PRPF8 |
| chr17 | 1554391  | 1554614  | PRPF8 |
| chr17 | 1554697  | 1554857  | PRPF8 |
| chr17 | 1554931  | 1555092  | PRPF8 |
| chr17 | 1556825  | 1556987  | PRPF8 |
| chr17 | 1557060  | 1557320  | PRPF8 |
| chr17 | 1558633  | 1558847  | PRPF8 |
| chr17 | 1559675  | 1559869  | PRPF8 |
| chr17 | 1559931  | 1560065  | PRPF8 |
| chr17 | 1561536  | 1561685  | PRPF8 |
| chr17 | 1561809  | 1562067  | PRPF8 |
| chr17 | 1562640  | 1562852  | PRPF8 |
| chr17 | 1563124  | 1563305  | PRPF8 |
| chr17 | 1563715  | 1563882  | PRPF8 |
| chr17 | 1563981  | 1564131  | PRPF8 |
| chr17 | 1564276  | 1564466  | PRPF8 |
| chr17 | 1564554  | 1564710  | PRPF8 |
| chr17 | 1564894  | 1565094  | PRPF8 |
| chr17 | 1565189  | 1565457  | PRPF8 |
| chr17 | 1576364  | 1576501  | PRPF8 |
| chr17 | 1576640  | 1576871  | PRPF8 |
| chr17 | 1577029  | 1577196  | PRPF8 |
| chr17 | 1577725  | 1577984  | PRPF8 |

|       |          |          |       |
|-------|----------|----------|-------|
| chr17 | 1578435  | 1578643  | PRPF8 |
| chr17 | 1578903  | 1579116  | PRPF8 |
| chr17 | 1579211  | 1579358  | PRPF8 |
| chr17 | 1579490  | 1579674  | PRPF8 |
| chr17 | 1579788  | 1580015  | PRPF8 |
| chr17 | 1580259  | 1580476  | PRPF8 |
| chr17 | 1580848  | 1580998  | PRPF8 |
| chr17 | 1581801  | 1581956  | PRPF8 |
| chr17 | 1582045  | 1582185  | PRPF8 |
| chr17 | 1582300  | 1582510  | PRPF8 |
| chr17 | 1582574  | 1582714  | PRPF8 |
| chr17 | 1582892  | 1583103  | PRPF8 |
| chr17 | 1584009  | 1584135  | PRPF8 |
| chr17 | 1584212  | 1584358  | PRPF8 |
| chr17 | 1584761  | 1584994  | PRPF8 |
| chr17 | 1585103  | 1585342  | PRPF8 |
| chr17 | 1585412  | 1585597  | PRPF8 |
| chr17 | 1586816  | 1587005  | PRPF8 |
| chr17 | 1587755  | 1587875  | PRPF8 |
| chr17 | 7565246  | 7565342  | TP53  |
| chr17 | 7569513  | 7569572  | TP53  |
| chr17 | 7572916  | 7573018  | TP53  |
| chr17 | 7573916  | 7574043  | TP53  |
| chr17 | 7576526  | 7576594  | TP53  |
| chr17 | 7576614  | 7576667  | TP53  |
| chr17 | 7576842  | 7576936  | TP53  |
| chr17 | 7577008  | 7577165  | TP53  |
| chr17 | 7577488  | 7577618  | TP53  |
| chr17 | 7578166  | 7578299  | TP53  |
| chr17 | 7578360  | 7578564  | TP53  |
| chr17 | 7579301  | 7579600  | TP53  |
| chr17 | 7579689  | 7579731  | TP53  |
| chr17 | 7579828  | 7579922  | TP53  |
| chr17 | 29422215 | 29422397 | NF1   |
| chr17 | 29482990 | 29483154 | NF1   |
| chr17 | 29486017 | 29486121 | NF1   |
| chr17 | 29490193 | 29490404 | NF1   |
| chr17 | 29496898 | 29497025 | NF1   |
| chr17 | 29508429 | 29508517 | NF1   |
| chr17 | 29508717 | 29508813 | NF1   |
| chr17 | 29509515 | 29509693 | NF1   |
| chr17 | 29527429 | 29527623 | NF1   |
| chr17 | 29528044 | 29528187 | NF1   |
| chr17 | 29528418 | 29528513 | NF1   |
| chr17 | 29533247 | 29533399 | NF1   |

|       |          |          |     |
|-------|----------|----------|-----|
| chr17 | 29541458 | 29541613 | NF1 |
| chr17 | 29546012 | 29546146 | NF1 |
| chr17 | 29548857 | 29549018 | NF1 |
| chr17 | 29550451 | 29550595 | NF1 |
| chr17 | 29552102 | 29552278 | NF1 |
| chr17 | 29553442 | 29553712 | NF1 |
| chr17 | 29554225 | 29554319 | NF1 |
| chr17 | 29554530 | 29554634 | NF1 |
| chr17 | 29556032 | 29556493 | NF1 |
| chr17 | 29556842 | 29557002 | NF1 |
| chr17 | 29557267 | 29557410 | NF1 |
| chr17 | 29557849 | 29557953 | NF1 |
| chr17 | 29559080 | 29559217 | NF1 |
| chr17 | 29559707 | 29559909 | NF1 |
| chr17 | 29560009 | 29560241 | NF1 |
| chr17 | 29562618 | 29562800 | NF1 |
| chr17 | 29562925 | 29563049 | NF1 |
| chr17 | 29575991 | 29576147 | NF1 |
| chr17 | 29579945 | 29580028 | NF1 |
| chr17 | 29585351 | 29585530 | NF1 |
| chr17 | 29586039 | 29586157 | NF1 |
| chr17 | 29587376 | 29587543 | NF1 |
| chr17 | 29588718 | 29588885 | NF1 |
| chr17 | 29592236 | 29592367 | NF1 |
| chr17 | 29652827 | 29653280 | NF1 |
| chr17 | 29654506 | 29654867 | NF1 |
| chr17 | 29657303 | 29657526 | NF1 |
| chr17 | 29661845 | 29662059 | NF1 |
| chr17 | 29663340 | 29663501 | NF1 |
| chr17 | 29663642 | 29663942 | NF1 |
| chr17 | 29664375 | 29664610 | NF1 |
| chr17 | 29664824 | 29664908 | NF1 |
| chr17 | 29665009 | 29665167 | NF1 |
| chr17 | 29665711 | 29665833 | NF1 |
| chr17 | 29667512 | 29667673 | NF1 |
| chr17 | 29670016 | 29670163 | NF1 |
| chr17 | 29676127 | 29676279 | NF1 |
| chr17 | 29677190 | 29677346 | NF1 |
| chr17 | 29679264 | 29679442 | NF1 |
| chr17 | 29683467 | 29683610 | NF1 |
| chr17 | 29683967 | 29684118 | NF1 |
| chr17 | 29684276 | 29684397 | NF1 |
| chr17 | 29685487 | 29685650 | NF1 |
| chr17 | 29685976 | 29686043 | NF1 |
| chr17 | 29687494 | 29687739 | NF1 |

|       |           |           |                  |
|-------|-----------|-----------|------------------|
| chr17 | 29701020  | 29701183  | NF1              |
| chr17 | 40359570  | 40359752  | STAT5B_e16       |
| chr17 | 40362183  | 40362325  | STAT5B_e15       |
| chr17 | 40467752  | 40467828  | STAT3_e21        |
| chr17 | 40468796  | 40468929  | STAT3_e20        |
| chr17 | 40469189  | 40469252  | STAT3_e19        |
| chr17 | 58677765  | 58678257  | PPM1D            |
| chr17 | 58700871  | 58701120  | PPM1D            |
| chr17 | 58711203  | 58711348  | PPM1D            |
| chr17 | 58725242  | 58725453  | PPM1D            |
| chr17 | 58733949  | 58734212  | PPM1D            |
| chr17 | 58740345  | 58740923  | PPM1D            |
| chr17 | 74732575  | 74733246  | srsf2_e1         |
| chr18 | 42531884  | 42531962  | setbp1_e4hotspot |
| chr19 | 13054521  | 13054733  | calr_e9          |
| chr19 | 33792144  | 33793420  | cebpa_e1         |
| chr2  | 25457137  | 25457299  | DNMT3A           |
| chr2  | 25458565  | 25458704  | DNMT3A           |
| chr2  | 25459794  | 25459884  | DNMT3A           |
| chr2  | 25461988  | 25462094  | DNMT3A           |
| chr2  | 25462348  | 25462392  | DNMT3A           |
| chr2  | 25463160  | 25463329  | DNMT3A           |
| chr2  | 25463498  | 25463609  | DNMT3A           |
| chr2  | 25464420  | 25464586  | DNMT3A           |
| chr2  | 25466756  | 25466861  | DNMT3A           |
| chr2  | 25467013  | 25467217  | DNMT3A           |
| chr2  | 25467398  | 25467531  | DNMT3A           |
| chr2  | 25468111  | 25468211  | DNMT3A           |
| chr2  | 25468878  | 25468943  | DNMT3A           |
| chr2  | 25469018  | 25469188  | DNMT3A           |
| chr2  | 25469478  | 25469655  | DNMT3A           |
| chr2  | 25469909  | 25470037  | DNMT3A           |
| chr2  | 25470449  | 25470628  | DNMT3A           |
| chr2  | 25470895  | 25471131  | DNMT3A           |
| chr2  | 25472515  | 25472603  | DNMT3A           |
| chr2  | 25475052  | 25475076  | DNMT3A           |
| chr2  | 25497799  | 25497966  | DNMT3A           |
| chr2  | 25498358  | 25498422  | DNMT3A           |
| chr2  | 25505246  | 25505590  | DNMT3A           |
| chr2  | 25522997  | 25523122  | DNMT3A           |
| chr2  | 25536771  | 25536863  | DNMT3A           |
| chr2  | 198266460 | 198266618 | sf3b1_e16        |
| chr2  | 198266703 | 198266860 | sf3b1_e15        |
| chr2  | 198267274 | 198267556 | sf3b1_e14        |
| chr2  | 198267667 | 198267765 | sf3b1_e13        |

|       |           |           |               |
|-------|-----------|-----------|---------------|
| chr2  | 198268303 | 198268494 | sf3b1_e12     |
| chr2  | 209113060 | 209113159 | IDH1          |
| chr20 | 31021078  | 31025148  | asxl1_e11-12  |
| chr20 | 33866989  | 33867019  | EIF6          |
| chr20 | 33867358  | 33867560  | EIF6          |
| chr20 | 33867734  | 33867931  | EIF6          |
| chr20 | 33868446  | 33868642  | EIF6          |
| chr20 | 33871968  | 33872300  | EIF6          |
| chr20 | 57484399  | 57484484  | gnas_e8       |
| chr20 | 57484570  | 57484640  | gnas_e9       |
| chr21 | 36164421  | 36164917  | RUNX1         |
| chr21 | 36171587  | 36171769  | RUNX1         |
| chr21 | 36193954  | 36194003  | RUNX1         |
| chr21 | 36206696  | 36206908  | RUNX1         |
| chr21 | 36228699  | 36228754  | RUNX1         |
| chr21 | 36231760  | 36231885  | RUNX1         |
| chr21 | 36252843  | 36253020  | RUNX1         |
| chr21 | 36259129  | 36259419  | RUNX1         |
| chr21 | 36261963  | 36262044  | RUNX1         |
| chr21 | 36265211  | 36265270  | RUNX1         |
| chr21 | 36421128  | 36421206  | RUNX1         |
| chr21 | 44514749  | 44514904  | u2af1_e6      |
| chr21 | 44524419  | 44524518  | u2af1_e2      |
| chr3  | 128198260 | 128200171 | GATA2_E7      |
| chr3  | 128200652 | 128202858 | GATA2_E5-6    |
| chr3  | 128204560 | 128205929 | GATA2_E3-4    |
| chr3  | 128206544 | 128207383 | GATA2_E1-2    |
| chr4  | 55589744  | 55589870  | kit_e8        |
| chr4  | 55593576  | 55593714  | kit_e11       |
| chr4  | 55599230  | 55599364  | kit_e17       |
| chr4  | 106111616 | 106111653 | TET2          |
| chr4  | 106155043 | 106158607 | TET2          |
| chr4  | 106162485 | 106162600 | TET2          |
| chr4  | 106163980 | 106164094 | TET2          |
| chr4  | 106164716 | 106164945 | TET2          |
| chr4  | 106180765 | 106180936 | TET2          |
| chr4  | 106182905 | 106183015 | TET2          |
| chr4  | 106190756 | 106190914 | TET2          |
| chr4  | 106193710 | 106194085 | TET2          |
| chr4  | 106196194 | 106197686 | TET2          |
| chr5  | 1295100   | 1295488   | TERT_promoter |
| chr5  | 148876405 | 148876433 | CSNK1A1       |
| chr5  | 148884994 | 148885168 | CSNK1A1       |
| chr5  | 148886579 | 148886706 | CSNK1A1       |
| chr5  | 148889431 | 148889526 | CSNK1A1       |

|      |           |           |          |
|------|-----------|-----------|----------|
| chr5 | 148891346 | 148891445 | CSNK1A1  |
| chr5 | 148892622 | 148892782 | CSNK1A1  |
| chr5 | 148897346 | 148897450 | CSNK1A1  |
| chr5 | 148899842 | 148899961 | CSNK1A1  |
| chr5 | 148904597 | 148904744 | CSNK1A1  |
| chr5 | 148929627 | 148929754 | CSNK1A1  |
| chr5 | 148930394 | 148930537 | CSNK1A1  |
| chr5 | 170837525 | 170837575 | npm1_e11 |
| chr7 | 66453350  | 66453496  | sbds_e5  |
| chr7 | 66456115  | 66456299  | sbds_e4  |
| chr7 | 66458198  | 66458411  | sbds_e3  |
| chr7 | 66459127  | 66459338  | sbds_e2  |
| chr7 | 66460269  | 66460412  | sbds_e1  |
| chr7 | 140453069 | 140453199 | braf_e15 |
| chr7 | 148504727 | 148504808 | EZH2     |
| chr7 | 148506152 | 148506257 | EZH2     |
| chr7 | 148506391 | 148506492 | EZH2     |
| chr7 | 148507414 | 148507516 | EZH2     |
| chr7 | 148508706 | 148508822 | EZH2     |
| chr7 | 148511040 | 148511239 | EZH2     |
| chr7 | 148511995 | 148512141 | EZH2     |
| chr7 | 148512587 | 148512648 | EZH2     |
| chr7 | 148513765 | 148513880 | EZH2     |
| chr7 | 148514303 | 148514493 | EZH2     |
| chr7 | 148514958 | 148515219 | EZH2     |
| chr7 | 148516677 | 148516789 | EZH2     |
| chr7 | 148523535 | 148523734 | EZH2     |
| chr7 | 148524245 | 148524368 | EZH2     |
| chr7 | 148525821 | 148525982 | EZH2     |
| chr7 | 148526809 | 148526950 | EZH2     |
| chr7 | 148529715 | 148529852 | EZH2     |
| chr7 | 148533903 | 148534102 | EZH2     |
| chr7 | 148543551 | 148543700 | EZH2     |
| chr7 | 148544263 | 148544400 | EZH2     |
| chr8 | 117859728 | 117859940 | RAD21    |
| chr8 | 117861174 | 117861278 | RAD21    |
| chr8 | 117862846 | 117863016 | RAD21    |
| chr8 | 117864176 | 117864345 | RAD21    |
| chr8 | 117864777 | 117864957 | RAD21    |
| chr8 | 117866473 | 117866717 | RAD21    |
| chr8 | 117868394 | 117868537 | RAD21    |
| chr8 | 117868874 | 117869020 | RAD21    |
| chr8 | 117869495 | 117869722 | RAD21    |
| chr8 | 117870580 | 117870707 | RAD21    |
| chr8 | 117874069 | 117874189 | RAD21    |



|      |           |           |          |
|------|-----------|-----------|----------|
| chr8 | 117875358 | 117875508 | RAD21    |
| chr8 | 117878814 | 117878978 | RAD21    |
| chr8 | 128748829 | 128748879 | MYC      |
| chr8 | 128750483 | 128751275 | MYC      |
| chr8 | 128752631 | 128753214 | MYC      |
| chr9 | 5069919   | 5070058   | JAK2_e12 |
| chr9 | 5073692   | 5073791   | JAK2_e14 |
| chr9 | 5078300   | 5078450   | JAK2_e16 |
| chrX | 15339617  | 15339904  | PIGA     |
| chrX | 15342776  | 15343003  | PIGA     |
| chrX | 15343131  | 15343284  | PIGA     |
| chrX | 15344025  | 15344178  | PIGA     |
| chrX | 15349327  | 15350062  | PIGA     |
| chrX | 15353612  | 15353645  | PIGA     |
| chrX | 15808608  | 15808669  | ZRSR2    |
| chrX | 15809046  | 15809146  | ZRSR2    |
| chrX | 15817984  | 15818086  | ZRSR2    |
| chrX | 15819386  | 15819647  | ZRSR2    |
| chrX | 15821800  | 15821929  | ZRSR2    |
| chrX | 15822223  | 15822330  | ZRSR2    |
| chrX | 15826345  | 15826404  | ZRSR2    |
| chrX | 15827312  | 15827451  | ZRSR2    |
| chrX | 15833789  | 15834023  | ZRSR2    |
| chrX | 15836699  | 15836775  | ZRSR2    |
| chrX | 15838319  | 15838449  | ZRSR2    |
| chrX | 15840843  | 15841375  | ZRSR2    |
| chrX | 39909158  | 39909254  | BCOR     |
| chrX | 39911351  | 39911663  | BCOR     |
| chrX | 39913124  | 39913305  | BCOR     |
| chrX | 39913498  | 39913596  | BCOR     |
| chrX | 39914610  | 39914776  | BCOR     |
| chrX | 39916397  | 39916584  | BCOR     |
| chrX | 39921381  | 39921656  | BCOR     |
| chrX | 39921988  | 39922334  | BCOR     |
| chrX | 39922850  | 39923215  | BCOR     |
| chrX | 39923578  | 39923862  | BCOR     |
| chrX | 39930215  | 39930422  | BCOR     |
| chrX | 39930879  | 39930953  | BCOR     |
| chrX | 39931591  | 39934443  | BCOR     |
| chrX | 39935696  | 39935795  | BCOR     |
| chrX | 39937086  | 39937192  | BCOR     |
| chrX | 53407013  | 53407117  | SMC1A    |
| chrX | 53407530  | 53407661  | SMC1A    |
| chrX | 53407928  | 53408018  | SMC1A    |
| chrX | 53409142  | 53409314  | SMC1A    |

|      |           |           |       |
|------|-----------|-----------|-------|
| chrX | 53409416  | 53409591  | SMC1A |
| chrX | 53410007  | 53410184  | SMC1A |
| chrX | 53421687  | 53421818  | SMC1A |
| chrX | 53423136  | 53423310  | SMC1A |
| chrX | 53423381  | 53423547  | SMC1A |
| chrX | 53426500  | 53426662  | SMC1A |
| chrX | 53430487  | 53430614  | SMC1A |
| chrX | 53430698  | 53430835  | SMC1A |
| chrX | 53431876  | 53432091  | SMC1A |
| chrX | 53432166  | 53432333  | SMC1A |
| chrX | 53432414  | 53432614  | SMC1A |
| chrX | 53432692  | 53432898  | SMC1A |
| chrX | 53435982  | 53436210  | SMC1A |
| chrX | 53436341  | 53436444  | SMC1A |
| chrX | 53438700  | 53438861  | SMC1A |
| chrX | 53438934  | 53439213  | SMC1A |
| chrX | 53439839  | 53440098  | SMC1A |
| chrX | 53440171  | 53440395  | SMC1A |
| chrX | 53441696  | 53441829  | SMC1A |
| chrX | 53441919  | 53442128  | SMC1A |
| chrX | 53448834  | 53448977  | SMC1A |
| chrX | 53449430  | 53449559  | SMC1A |
| chrX | 123156467 | 123156531 | STAG2 |
| chrX | 123159679 | 123159778 | STAG2 |
| chrX | 123160404 | 123160478 | STAG2 |
| chrX | 123164800 | 123164985 | STAG2 |
| chrX | 123171366 | 123171483 | STAG2 |
| chrX | 123176408 | 123176505 | STAG2 |
| chrX | 123179003 | 123179228 | STAG2 |
| chrX | 123181193 | 123181365 | STAG2 |
| chrX | 123182844 | 123182938 | STAG2 |
| chrX | 123184025 | 123184169 | STAG2 |
| chrX | 123184960 | 123185079 | STAG2 |
| chrX | 123185154 | 123185254 | STAG2 |
| chrX | 123189967 | 123190095 | STAG2 |
| chrX | 123191705 | 123191837 | STAG2 |
| chrX | 123195063 | 123195201 | STAG2 |
| chrX | 123195610 | 123195734 | STAG2 |
| chrX | 123196741 | 123196854 | STAG2 |
| chrX | 123196955 | 123197065 | STAG2 |
| chrX | 123197687 | 123197911 | STAG2 |
| chrX | 123199715 | 123199806 | STAG2 |
| chrX | 123200014 | 123200122 | STAG2 |
| chrX | 123200195 | 123200296 | STAG2 |
| chrX | 123202403 | 123202516 | STAG2 |

|      |           |           |        |
|------|-----------|-----------|--------|
| chrX | 123204988 | 123205183 | STAG2  |
| chrX | 123210171 | 123210331 | STAG2  |
| chrX | 123211796 | 123211918 | STAG2  |
| chrX | 123215219 | 123215388 | STAG2  |
| chrX | 123217260 | 123217409 | STAG2  |
| chrX | 123220386 | 123220630 | STAG2  |
| chrX | 123224414 | 123224624 | STAG2  |
| chrX | 123224693 | 123224824 | STAG2  |
| chrX | 123227857 | 123228004 | STAG2  |
| chrX | 123229211 | 123229309 | STAG2  |
| chrX | 123234413 | 123234457 | STAG2  |
| chrX | 129139197 | 129139303 | BCORL1 |
| chrX | 129146543 | 129146654 | BCORL1 |
| chrX | 129146915 | 129150199 | BCORL1 |
| chrX | 129154949 | 129155135 | BCORL1 |
| chrX | 129156861 | 129156962 | BCORL1 |
| chrX | 129158954 | 129159364 | BCORL1 |
| chrX | 129162599 | 129162846 | BCORL1 |
| chrX | 129171331 | 129171518 | BCORL1 |
| chrX | 129173101 | 129173267 | BCORL1 |
| chrX | 129184681 | 129184779 | BCORL1 |
| chrX | 129185824 | 129186001 | BCORL1 |
| chrX | 129189818 | 129190121 | BCORL1 |
| chrX | 133511637 | 133511795 | PHF6   |
| chrX | 133512024 | 133512146 | PHF6   |
| chrX | 133527520 | 133527674 | PHF6   |
| chrX | 133527928 | 133527992 | PHF6   |
| chrX | 133547507 | 133547697 | PHF6   |
| chrX | 133547842 | 133548006 | PHF6   |
| chrX | 133549035 | 133549262 | PHF6   |
| chrX | 133551188 | 133551346 | PHF6   |
| chrX | 133559220 | 133559370 | PHF6   |





**Supplementary Table 4: Primers used in qPCR and site directed mutagenesis of EIF6.**

| <b>Gene or EIF6 SDM amino acid change</b> | <b>primer sequence</b>    |
|-------------------------------------------|---------------------------|
| hEIF6 Forward                             | CCTTGGACCCAGCTTTCTT       |
| hEIF6 Reverse across V5 tag               | TACTGTGAGACCTAGGAGTG      |
| GAPDH Forward                             | TGCACCACCAACTGCTTAGC      |
| GAPDH Reverse                             | GGCATGGACTGTGGTCATGAG     |
| CDKN1A Forward                            | CAGCATGACAGATTTCTACC      |
| CDKN1A Reverse                            | CAGGGTATGTACATGAGGAG      |
| I13NForward                               | AACTGTGAGAAaCGGCTGCTTTG   |
| I13NReverse                               | GTTCTCGAACGAAGCTCG        |
| R67WForward                               | TGTGGGGAACTGGCACGGTCT     |
| R67WReverse                               | CACATGCGCCCGATGATG        |
| G69SForward                               | GAACAGGCACaGTCTCCTGGTACCC |
| G69SReverse                               | CCCACACACATGCGCCCG        |
| P73RForward                               | CTCCTGGTACgCAACAATACCACC  |
| P73RReverse                               | ACCGTGCCTGTTCCCCAC        |
| R96WForward                               | GCAGATTAGGTGGGTGGAGGA     |
| R96WReverse                               | ACTGTGTCTGGGAGGCTG        |
| N106Forward                               | GCCTTGGGCAGTGTCACCACC     |
| N106Reverse                               | TGAGAGCCGCTCCTCCAC        |
| A194TForward                              | TGAGGTGATTaCTGCTGGGATG    |
| A194TReverse                              | CTGCCTCGGTTACAGTC         |
| G196RForward                              | GATTGCTGCTaGGATGGTGGTG    |
| G196RReverse                              | ACCTCACTGCCTCGGTTC        |

**Supplementary Table 5: Single cell sequencing coordinates**

| chromosome | position start | position stop |
|------------|----------------|---------------|
| chr2       | 25457136       | 25457349      |
| chr2       | 25458539       | 25458743      |
| chr2       | 25459801       | 25460005      |
| chr2       | 25461899       | 25462103      |
| chr2       | 25463127       | 25463327      |
| chr2       | 25463465       | 25463671      |
| chr2       | 25464369       | 25464585      |
| chr2       | 25466697       | 25466860      |
| chr2       | 25467026       | 25467230      |
| chr2       | 25467400       | 25467614      |
| chr2       | 25468072       | 25468306      |
| chr2       | 25468723       | 25468904      |
| chr2       | 25469027       | 25469218      |
| chr2       | 25469485       | 25469694      |
| chr2       | 25469895       | 25470109      |
| chr2       | 25470457       | 25470627      |
| chr2       | 25470904       | 25471114      |
| chr2       | 25472488       | 25472689      |
| chr2       | 25474735       | 25474963      |
| chr2       | 25475065       | 25475238      |
| chr2       | 25497765       | 25497972      |
| chr2       | 25498273       | 25498447      |
| chr2       | 25505317       | 25505550      |
| chr2       | 25522949       | 25523150      |
| chr2       | 25536735       | 25536925      |
| chr4       | 106155105      | 106155319     |
| chr4       | 106155368      | 106155560     |
| chr4       | 106155630      | 106155857     |
| chr4       | 106155904      | 106156137     |
| chr4       | 106156272      | 106156502     |
| chr4       | 106156609      | 106156809     |
| chr4       | 106156890      | 106157081     |
| chr4       | 106157171      | 106157363     |
| chr4       | 106157414      | 106157601     |
| chr4       | 106157656      | 106157772     |
| chr4       | 106157835      | 106158047     |
| chr4       | 106158107      | 106158311     |
| chr4       | 106158389      | 106158599     |
| chr4       | 106162450      | 106162651     |
| chr4       | 106163977      | 106164165     |
| chr4       | 106164725      | 106164932     |
| chr4       | 106180744      | 106180929     |
| chr4       | 106182858      | 106183005     |

|       |           |           |
|-------|-----------|-----------|
| chr4  | 106190709 | 106190903 |
| chr4  | 106193540 | 106193738 |
| chr4  | 106193794 | 106194016 |
| chr4  | 106194057 | 106194281 |
| chr4  | 106196203 | 106196436 |
| chr4  | 106196481 | 106196669 |
| chr4  | 106196713 | 106196872 |
| chr4  | 106196922 | 106197107 |
| chr4  | 106197213 | 106197443 |
| chr4  | 106197502 | 106197682 |
| chr5  | 148899836 | 148900029 |
| chr5  | 148904571 | 148904738 |
| chr7  | 13010156  | 13010358  |
| chr7  | 25435592  | 25435755  |
| chr7  | 34230275  | 34230449  |
| chr7  | 50545021  | 50545221  |
| chr7  | 52518590  | 52518774  |
| chr7  | 66116028  | 66116230  |
| chr7  | 66456179  | 66456393  |
| chr7  | 66459178  | 66459405  |
| chr7  | 68003177  | 68003365  |
| chr7  | 70132929  | 70133091  |
| chr7  | 75322548  | 75322746  |
| chr7  | 80864445  | 80864629  |
| chr7  | 82857047  | 82857229  |
| chr7  | 88441439  | 88441593  |
| chr7  | 93225093  | 93225275  |
| chr7  | 94484213  | 94484392  |
| chr17 | 3444147   | 3444340   |
| chr17 | 5906390   | 5906565   |
| chr17 | 6202241   | 6202420   |
| chr17 | 7572919   | 7573112   |
| chr17 | 7573884   | 7574087   |
| chr17 | 7576499   | 7576700   |
| chr17 | 7576779   | 7576969   |
| chr17 | 7577015   | 7577175   |
| chr17 | 7577405   | 7577614   |
| chr17 | 7578098   | 7578294   |
| chr17 | 7578353   | 7578564   |
| chr17 | 7579314   | 7579547   |
| chr17 | 7579698   | 7579929   |
| chr17 | 8934656   | 8934808   |
| chr17 | 9806662   | 9806862   |
| chr17 | 10916913  | 10917087  |
| chr17 | 13960334  | 13960492  |



|       |          |          |
|-------|----------|----------|
| chr17 | 58740315 | 58740481 |
| chr17 | 58740530 | 58740735 |
| chr17 | 58740781 | 58740969 |
| chr20 | 6047840  | 6048015  |
| chr20 | 8699445  | 8699615  |
| chr20 | 16075717 | 16075920 |
| chr20 | 16702487 | 16702683 |
| chr20 | 18990856 | 18991015 |
| chr20 | 20765111 | 20765246 |
| chr20 | 33488766 | 33488964 |
| chr20 | 33867359 | 33867564 |
| chr20 | 33867741 | 33867943 |
| chr20 | 33868448 | 33868631 |
| chr20 | 33868679 | 33868849 |
| chr20 | 33871887 | 33872067 |
| chr20 | 33872135 | 33872326 |
| chr20 | 36816080 | 36816262 |
| chr20 | 37493143 | 37493312 |
| chr20 | 39271393 | 39271576 |
| chr20 | 39950650 | 39950826 |

Supplementary Table 6: Somatic Mutations detected in SDS Cohort

| Cohort ID | Timepoint | chrom | position start | position end | coordinates            | reference | variant | gene    | cdna         | aa       | result              | reads1 | reads2 | var_freq |
|-----------|-----------|-------|----------------|--------------|------------------------|-----------|---------|---------|--------------|----------|---------------------|--------|--------|----------|
| 1         | A         | 20    | 33868509       | 33868509     | 20:33868509-33868509   | T         | C       | E1F6    | c.A317G      | p.N106S  | nonsynonymous SNV   | 806    | 12     | 0.0147   |
| 1         | A         | 17    | 7577094        | 7577094      | 17:7577094-7577094     | G         | A       | TP53    | c.C844T      | p.R282W  | nonsynonymous SNV   | 845    | 5      | 0.0059   |
| 5         | A         | 20    | 33868509       | 33868509     | 20:33868509-33868509   | T         | C       | E1F6    | c.A317G      | p.N106S  | nonsynonymous SNV   | 942    | 10     | 0.0105   |
| 5         | A         | 20    | 33868573       | 33868573     | 20:33868573-33868573   | G         | -       | E1F6    | c.253delC    | p.R85fs  | frameshift deletion | 923    | 7      | 0.0075   |
| 5         | A         | 20    | 33868633       | 33868633     | 20:33868633-33868633   | C         | G       | E1F6    | c.194-1G>C   |          | splicing            | 648    | 3      | 0.0046   |
| 5         | A         | 20    | 33872219       | 33872219     | 20:33872219-33872219   | A         | -       | E1F6    | c.72delE     | p.C24fs  | frameshift deletion | 873    | 22     | 0.0246   |
| 5         | A         | 17    | 7577534        | 7577534      | 17:7577534-7577534     | C         | G       | TP53    | c.G747C      | p.R249S  | nonsynonymous SNV   | 990    | 3      | 0.003    |
| 5         | A         | 17    | 7578236        | 7578236      | 17:7578236-7578236     | A         | G       | TP53    | c.T613C      | p.Y205H  | nonsynonymous SNV   | 1062   | 6      | 0.0056   |
| 5         | A         | 17    | 7578508        | 7578508      | 17:7578508-7578508     | C         | T       | TP53    | c.G422A      | p.C141Y  | nonsynonymous SNV   | 1022   | 5      | 0.0049   |
| 8         | A         | 20    | 33872187       | 33872188     | 20:33872187-33872188   | O         | -       | E1F6    | c.103_104del | p.Y35fs  | frameshift deletion | 942    | 17     | 0.0177   |
| 8         | A         | 17    | 7577121        | 7577121      | 17:7577121-7577121     | G         | A       | TP53    | c.C817T      | p.R273C  | nonsynonymous SNV   | 837    | 84     | 0.0912   |
| 9         | A         | 5     | 148904673      | 148904673    | 5:148904673-148904673  | C         | T       | CSNK1A1 | c.G292A      | p.E98K   | nonsynonymous SNV   | 773    | 9      | 0.0115   |
| 9         | B         | 5     | 148904673      | 148904673    | 5:148904673-148904673  | C         | T       | CSNK1A1 | c.G292A      | p.E98K   | nonsynonymous SNV   | 758    | 12     | 0.0156   |
| 10        | A         | 17    | 7578190        | 7578190      | 17:7578190-7578190     | T         | C       | TP53    | c.A659G      | p.Y220C  | nonsynonymous SNV   | 786    | 3      | 0.0038   |
| 11        | A         | 2     | 209113113      | 209113113    | 2:209113113-209113113  | G         | A       | IDH1    | c.C394T      | p.R132C  | nonsynonymous SNV   | 520    | 300    | 0.3659   |
| 13        | Z         | X     | 39922007       | 39922007     | X:39922007-39922007    | C         | T       | BCOR    | c.G4165A     | p.D1389N | nonsynonymous SNV   | 798    | 7      | 0.0087   |
| 13        | Z         | X     | 39922007       | 39922007     | X:39922007-39922007    | C         | T       | BCOR    | c.G4165A     | p.D1389N | nonsynonymous SNV   | 990    | 5      | 0.005    |
| 13        | 1         | 20    | 33867759       | 33867759     | 20:33867759-33867759   | G         | A       | E1F6    | c.C475T      | p.Q159X  | stopgain            | 2347   | 5      | 0.0021   |
| 13        | 1         | 20    | 33867782       | 33867782     | 20:33867782-33867782   | T         | G       | E1F6    | c.A452C      | p.Q151P  | nonsynonymous SNV   | 2743   | 5      | 0.0018   |
| 13        | 1         | 20    | 33872183       | 33872183     | 20:33872183-33872183   | C         | A       | E1F6    | c.K108T      | p.R36S   | nonsynonymous SNV   | 2698   | 16     | 0.0059   |
| 13        | Z         | 12    | 25398285       | 25398285     | 12:25398285-25398285   | C         | A       | KRAS    | c.G34T       | p.G12C   | nonsynonymous SNV   | 976    | 3      | 0.0031   |
| 13        | 1         | 17    | 58740651       | 58740651     | 17:58740651-58740651   | G         | -       | PPM1D   | c.G516delG   | p.G519fs | frameshift deletion | 2572   | 4      | 0.0016   |
| 13        | 1         | 17    | 7577121        | 7577121      | 17:7577121-7577121     | G         | A       | TP53    | c.C817T      | p.R273C  | nonsynonymous SNV   | 2435   | 3      | 0.0012   |
| 13        | Z         | 17    | 7577124        | 7577124      | 17:7577124-7577124     | C         | T       | TP53    | c.G814A      | p.V272M  | nonsynonymous SNV   | 510    | 357    | 0.4118   |
| 13        | 1         | 17    | 7577124        | 7577124      | 17:7577124-7577124     | C         | T       | TP53    | c.G814A      | p.V272M  | nonsynonymous SNV   | 1962   | 414    | 0.1742   |
| 13        | Z         | 17    | 7577124        | 7577124      | 17:7577124-7577124     | C         | T       | TP53    | c.G814A      | p.V272M  | nonsynonymous SNV   | 632    | 474    | 0.4286   |
| 13        | Z         | 17    | 7577152        | 7577152      | 17:7577152-7577152     | A         | -       | TP53    | c.786delT    | p.G262fs | frameshift deletion | 388    | 299    | 0.4352   |
| 13        | 1         | 17    | 7577152        | 7577152      | 17:7577152-7577152     | A         | -       | TP53    | c.786delT    | p.G262fs | frameshift deletion | 1516   | 323    | 0.1756   |
| 13        | Z         | 17    | 7577152        | 7577152      | 17:7577152-7577152     | A         | -       | TP53    | c.786delT    | p.G262fs | frameshift deletion | 479    | 380    | 0.4424   |
| 13        | 1         | 17    | 7577529        | 7577529      | 17:7577529-7577529     | A         | T       | TP53    | c.T752A      | p.I251N  | nonsynonymous SNV   | 2260   | 10     | 0.0044   |
| 13        | 1         | 17    | 7577539        | 7577539      | 17:7577539-7577539     | G         | A       | TP53    | c.C742T      | p.R248W  | nonsynonymous SNV   | 2403   | 3      | 0.0012   |
| 13        | 1         | 17    | 7577568        | 7577568      | 17:7577568-7577568     | C         | T       | TP53    | c.G713A      | p.C238Y  | nonsynonymous SNV   | 2159   | 4      | 0.0018   |
| 13        | 1         | 17    | 7578475        | 7578475      | 17:7578475-7578475     | G         | A       | TP53    | c.C455T      | p.P152L  | nonsynonymous SNV   | 2813   | 3      | 0.0011   |
| 13        | 1         | 17    | 7578496        | 7578496      | 17:7578496-7578496     | A         | T       | TP53    | c.T434A      | p.L145Q  | nonsynonymous SNV   | 2937   | 3      | 0.001    |
| 13        | 1         | 17    | 7578535        | 7578535      | 17:7578535-7578535     | T         | C       | TP53    | c.A395G      | p.K132R  | nonsynonymous SNV   | 2356   | 14     | 0.0059   |
| 13        | Z         | 21    | 44514777       | 44514777     | 21:44514777-44514777   | T         | C       | U2AF1   | c.A470G      | p.Q157R  | nonsynonymous SNV   | 537    | 373    | 0.4099   |
| 13        | 1         | 21    | 44514777       | 44514777     | 21:44514777-44514777   | T         | C       | U2AF1   | c.A470G      | p.Q157R  | nonsynonymous SNV   | 1829   | 389    | 0.1754   |
| 13        | Z         | 21    | 44514777       | 44514777     | 21:44514777-44514777   | T         | C       | U2AF1   | c.A470G      | p.Q157R  | nonsynonymous SNV   | 685    | 459    | 0.4012   |
| 14        | A         | 20    | 33868509       | 33868509     | 20:33868509-33868509   | T         | C       | E1F6    | c.A317G      | p.N106S  | nonsynonymous SNV   | 1059   | 4      | 0.0038   |
| 14        | B         | 20    | 33868509       | 33868509     | 20:33868509-33868509   | T         | C       | E1F6    | c.A317G      | p.N106S  | nonsynonymous SNV   | 1278   | 6      | 0.0047   |
| 14        | A         | 20    | 33871990       | 33871990     | 20:33871990-33871990   | C         | T       | E1F6    | c.G301A      | p.A101T  | nonsynonymous SNV   | 812    | 21     | 0.0252   |
| 14        | B         | 20    | 33871990       | 33871990     | 20:33871990-33871990   | C         | T       | E1F6    | c.G301A      | p.A101T  | nonsynonymous SNV   | 912    | 23     | 0.0246   |
| 14        | Z         | 1     | 115256529      | 115256529    | 1:115256529-115256529  | T         | C       | NRAS    | c.A3182G     | p.Q61R   | nonsynonymous SNV   | 715    | 3      | 0.0042   |
| 14        | Z         | 12    | 112888199      | 112888199    | 12:112888199-112888199 | C         | T       | PTPN11  | c.C215T      | p.A72V   | nonsynonymous SNV   | 1171   | 4      | 0.0034   |
| 14        | Z         | 12    | 112926888      | 112926888    | 12:112926888-112926888 | G         | C       | PTPN11  | c.G1508C     | p.G503A  | nonsynonymous SNV   | 1269   | 15     | 0.0117   |
| 14        | A         | 17    | 7573996        | 7573996      | 17:7573996-7573996     | A         | G       | TP53    | c.T1031C     | p.L344P  | nonsynonymous SNV   | 785    | 199    | 0.2022   |
| 14        | B         | 17    | 7573996        | 7573996      | 17:7573996-7573996     | A         | G       | TP53    | c.T1031C     | p.L344P  | nonsynonymous SNV   | 953    | 302    | 0.2406   |
| 14        | C         | 17    | 7573996        | 7573996      | 17:7573996-7573996     | A         | G       | TP53    | c.T1031C     | p.L344P  | nonsynonymous SNV   | 789    | 398    | 0.3353   |
| 14        | Z         | 17    | 7573996        | 7573996      | 17:7573996-7573996     | A         | G       | TP53    | c.T1031C     | p.L344P  | nonsynonymous SNV   | 723    | 554    | 0.4338   |
| 14        | A         | 17    | 7577538        | 7577538      | 17:7577538-7577538     | C         | T       | TP53    | c.G743A      | p.R248Q  | nonsynonymous SNV   | 590    | 259    | 0.3051   |
| 14        | B         | 17    | 7577538        | 7577538      | 17:7577538-7577538     | C         | T       | TP53    | c.G743A      | p.R248Q  | nonsynonymous SNV   | 685    | 347    | 0.3362   |
| 14        | C         | 17    | 7577538        | 7577538      | 17:7577538-7577538     | C         | T       | TP53    | c.G743A      | p.R248Q  | nonsynonymous SNV   | 636    | 317    | 0.3326   |
| 14        | Z         | 17    | 7577538        | 7577538      | 17:7577538-7577538     | C         | T       | TP53    | c.G743A      | p.R248Q  | nonsynonymous SNV   | 614    | 507    | 0.4523   |
| 14        | A         | 17    | 7578406        | 7578406      | 17:7578406-7578406     | C         | T       | TP53    | c.G524A      | p.R175H  | nonsynonymous SNV   | 1075   | 8      | 0.0074   |
| 14        | B         | 17    | 7578406        | 7578406      | 17:7578406-7578406     | C         | T       | TP53    | c.G524A      | p.R175H  | nonsynonymous SNV   | 1241   | 7      | 0.0056   |
| 15        | B         | 20    | 33872244       | 33872244     | 20:33872244-33872244   | A         | G       | E1F6    | c.T47C       | p.F16S   | nonsynonymous SNV   | 1003   | 3      | 0.003    |
| 17        | L         | 20    | 33867001       | 33867001     | 20:33867001-33867001   | C         | G       | E1F6    | c.G680C      | p.X227S  | stoploss            | 897    | 16     | 0.0175   |
| 17        | K         | 20    | 33867001       | 33867001     | 20:33867001-33867001   | C         | G       | E1F6    | c.G680C      | p.X227S  | stoploss            | 1081   | 19     | 0.0173   |
| 17        | E         | 20    | 33867001       | 33867001     | 20:33867001-33867001   | C         | G       | E1F6    | c.G680C      | p.X227S  | stoploss            | 958    | 13     | 0.0134   |
| 17        | I         | 20    | 33867001       | 33867001     | 20:33867001-33867001   | C         | G       | E1F6    | c.G680C      | p.X227S  | stoploss            | 946    | 30     | 0.0307   |
| 17        | H         | 20    | 33867001       | 33867001     | 20:33867001-33867001   | C         | G       | E1F6    | c.G680C      | p.X227S  | stoploss            | 869    | 12     | 0.0136   |
| 17        | C         | 20    | 33867001       | 33867001     | 20:33867001-33867001   | C         | G       | E1F6    | c.G680C      | p.X227S  | stoploss            | 1436   | 40     | 0.0271   |
| 17        | A         | 20    | 33867001       | 33867001     | 20:33867001-33867001   | C         | G       | E1F6    | c.G680C      | p.X227S  | stoploss            | 905    | 39     | 0.0413   |
| 17        | B         | 20    | 33867001       | 33867001     | 20:33867001-33867001   | C         | G       | E1F6    | c.G680C      | p.X227S  | stoploss            | 1050   | 15     | 0.0141   |
| 17        | J         | 20    | 33867001       | 33867001     | 20:33867001-33867001   | C         | G       | E1F6    | c.G680C      | p.X227S  | stoploss            | 940    | 16     | 0.0167   |
| 17        | G         | 20    | 33867001       | 33867001     | 20:33867001-33867001   | C         | G       | E1F6    | c.G680C      | p.X227S  | stoploss            | 720    | 22     | 0.0296   |
| 17        | D         | 20    | 33867001       | 33867001     | 20:33867001-33867001   | C         | G       | E1F6    | c.G680C      | p.X227S  | stoploss            | 1073   | 14     | 0.0129   |
| 17        | A         | 20    | 33867547       | 33867547     | 20:33867547-33867547   | C         | T       | E1F6    | c.G493A      | p.G165R  | nonsynonymous SNV   | 746    | 3      | 0.004    |
| 17        | G         | 20    | 33867547       | 33867547     | 20:33867547-33867547   | C         | T       | E1F6    | c.G493A      | p.G165R  | nonsynonymous SNV   | 604    | 6      | 0.0098   |
| 17        | B         | 20    | 33871979       | 33871979     | 20:33871979-33871979   | C         | T       | E1F6    | c.G312A      | p.W104X  | stopgain            | 766    | 3      | 0.0039   |
| 17        | A         | 20    | 33872246       | 33872246     | 20:33872246-33872246   | G         | -       | E1F6    | c.45delC     | p.C15fs  | frameshift deletion | 953    | 22     | 0.0226   |
| 17        | B         | 20    | 33872246       | 33872246     | 20:33872246-33872246   | G         | -       | E1F6    | c.45delC     | p.C15fs  | frameshift deletion | 1033   | 3      | 0.0029   |
| 17        | C         | 20    | 33872246       | 33872246     | 20:33872246-33872246   | G         | -       | E1F6    | c.45delC     | p.C15fs  | frameshift deletion | 1349   | 3      | 0.0022   |
| 17        | D         | 20    | 33872246       | 33872246     | 20:33872246-33872246   | G         | -       | E1F6    | c.45delC     | p.C15fs  | frameshift deletion | 1006   | 3      | 0.003    |
| 17        | E         | 20    | 33872246       | 3387224      |                        |           |         |         |              |          |                     |        |        |          |

|    |   |    |          |          |                      |   |   |       |              |          |                     |      |     |        |
|----|---|----|----------|----------|----------------------|---|---|-------|--------------|----------|---------------------|------|-----|--------|
| 18 | B | 17 | 7577508  | 7577508  | 17-7577508-7577508   | T | C | TP53  | c.A773G      | p.E258G  | nonsynonymous SNV   | 793  | 31  | 0.0376 |
| 18 | C | 17 | 7577508  | 7577508  | 17-7577508-7577508   | T | C | TP53  | c.A773G      | p.E258G  | nonsynonymous SNV   | 1049 | 58  | 0.0524 |
| 18 | A | 17 | 7577539  | 7577539  | 17-7577539-7577539   | G | A | TP53  | c.C742T      | p.R248W  | nonsynonymous SNV   | 949  | 8   | 0.0084 |
| 18 | B | 17 | 7577539  | 7577539  | 17-7577539-7577539   | G | A | TP53  | c.C742T      | p.R248W  | nonsynonymous SNV   | 1012 | 10  | 0.0098 |
| 18 | C | 17 | 7577539  | 7577539  | 17-7577539-7577539   | G | A | TP53  | c.C742T      | p.R248W  | nonsynonymous SNV   | 1384 | 16  | 0.0114 |
| 18 | A | 17 | 7578393  | 7578393  | 17-7578393-7578393   | A | T | TP53  | c.T537A      | p.H179Q  | nonsynonymous SNV   | 852  | 158 | 0.1564 |
| 18 | B | 17 | 7578393  | 7578393  | 17-7578393-7578393   | A | T | TP53  | c.T537A      | p.H179Q  | nonsynonymous SNV   | 909  | 137 | 0.131  |
| 18 | C | 17 | 7578393  | 7578393  | 17-7578393-7578393   | A | T | TP53  | c.T537A      | p.H179Q  | nonsynonymous SNV   | 1343 | 208 | 0.1341 |
| 20 | B | 20 | 33867888 | 33867888 | 20-33867888-33867888 | C | T | E1F6  | c.G346A      | p.V116M  | nonsynonymous SNV   | 824  | 6   | 0.0072 |
| 20 | B | 20 | 33868584 | 33868584 | 20-33868584-33868584 | A | C | E1F6  | c.T242G      | p.L81R   | nonsynonymous SNV   | 945  | 3   | 0.0032 |
| 21 | 2 | 20 | 33868509 | 33868509 | 20-33868509-33868509 | T | C | E1F6  | c.A317G      | p.N106S  | nonsynonymous SNV   | 1294 | 5   | 0.0038 |
| 21 | A | 20 | 33868531 | 33868531 | 20-33868531-33868531 | C | T | E1F6  | c.G295A      | p.E99K   | nonsynonymous SNV   | 709  | 4   | 0.0056 |
| 21 | A | 17 | 7577543  | 7577543  | 17-7577543-7577543   | C | A | TP53  | c.G738T      | p.M246I  | nonsynonymous SNV   | 693  | 3   | 0.0043 |
| 21 | 1 | 17 | 7577543  | 7577543  | 17-7577543-7577543   | C | A | TP53  | c.G738T      | p.M246I  | nonsynonymous SNV   | 1164 | 3   | 0.0026 |
| 21 | 2 | 17 | 7577543  | 7577543  | 17-7577543-7577543   | C | A | TP53  | c.G738T      | p.M246I  | nonsynonymous SNV   | 1158 | 5   | 0.0043 |
| 21 | 2 | 17 | 7578212  | 7578212  | 17-7578212-7578212   | G | C | TP53  | c.C637G      | p.R213G  | nonsynonymous SNV   | 1014 | 3   | 0.0029 |
| 23 | D | 20 | 33867368 | 33867368 | 20-33867368-33867368 | C | T | E1F6  | c.671+1G>A   |          | splicing            | 1319 | 4   | 0.003  |
| 23 | E | 20 | 33867368 | 33867368 | 20-33867368-33867368 | C | T | E1F6  | c.671+1G>A   |          | splicing            | 970  | 4   | 0.0041 |
| 23 | G | 20 | 33867368 | 33867368 | 20-33867368-33867368 | C | T | E1F6  | c.671+1G>A   |          | splicing            | 682  | 7   | 0.0102 |
| 23 | D | 20 | 33867468 | 33867468 | 20-33867468-33867468 | G | A | E1F6  | c.C572T      | p.T191I  | nonsynonymous SNV   | 1876 | 6   | 0.0032 |
| 23 | G | 20 | 33867534 | 33867534 | 20-33867534-33867534 | C | G | E1F6  | c.G506C      | p.R169P  | nonsynonymous SNV   | 899  | 3   | 0.0033 |
| 23 | G | 20 | 33867916 | 33867916 | 20-33867916-33867916 | T | - | E1F6  | c.C318delA   | p.T106fs | frameshift deletion | 754  | 3   | 0.004  |
| 23 | G | 20 | 33868582 | 33868582 | 20-33868582-33868582 | G | A | E1F6  | c.C244T      | p.Q82X   | stopgain            | 1060 | 3   | 0.0028 |
| 23 | E | 20 | 33872073 | 33872073 | 20-33872073-33872073 | A | C | E1F6  | c.T218G      | p.V73G   | nonsynonymous SNV   | 1243 | 4   | 0.0032 |
| 23 | G | 20 | 33872073 | 33872073 | 20-33872073-33872073 | A | C | E1F6  | c.T218G      | p.V73G   | nonsynonymous SNV   | 791  | 3   | 0.0038 |
| 23 | E | 17 | 1565301  | 1565301  | 17-1565301-1565301   | C | A | PRPF8 | c.G3921T     | p.M1307I | nonsynonymous SNV   | 1344 | 3   | 0.0022 |
| 23 | G | 17 | 1565301  | 1565301  | 17-1565301-1565301   | C | A | PRPF8 | c.G3921T     | p.M1307I | nonsynonymous SNV   | 949  | 5   | 0.0052 |
| 23 | A | 17 | 7577568  | 7577568  | 17-7577568-7577568   | C | A | TP53  | c.G713T      | p.C238F  | nonsynonymous SNV   | 832  | 3   | 0.0036 |
| 23 | D | 17 | 7579349  | 7579349  | 17-7579349-7579349   | A | C | TP53  | c.T338G      | p.F113C  | nonsynonymous SNV   | 1794 | 3   | 0.0017 |
| 24 | D | 20 | 33868587 | 33868587 | 20-33868587-33868587 | T | C | E1F6  | c.A239G      | p.E80G   | nonsynonymous SNV   | 1304 | 4   | 0.0031 |
| 26 | A | 20 | 33872035 | 33872035 | 20-33872035-33872035 | A | C | E1F6  | c.T256G      | p.S86A   | nonsynonymous SNV   | 386  | 108 | 0.2186 |
| 26 | A | 17 | 7577538  | 7577538  | 17-7577538-7577538   | C | T | TP53  | c.G743A      | p.R248Q  | nonsynonymous SNV   | 482  | 115 | 0.1926 |
| 26 | A | 17 | 7577539  | 7577539  | 17-7577539-7577539   | G | A | TP53  | c.C742T      | p.R248W  | nonsynonymous SNV   | 601  | 4   | 0.0066 |
| 26 | A | 17 | 7578403  | 7578403  | 17-7578403-7578403   | C | T | TP53  | c.G527A      | p.C176Y  | nonsynonymous SNV   | 658  | 3   | 0.0045 |
| 27 | C | 20 | 33867438 | 33867438 | 20-33867438-33867438 | D | - | E1F6  | c.602_605del | p.S201fs | frameshift deletion | 853  | 3   | 0.0035 |
| 27 | C | 20 | 33867517 | 33867517 | 20-33867517-33867517 | C | T | E1F6  | c.G523A      | p.A175T  | nonsynonymous SNV   | 858  | 3   | 0.0035 |
| 27 | B | 20 | 33867535 | 33867535 | 20-33867535-33867535 | G | A | E1F6  | c.C505T      | p.R169X  | stopgain            | 771  | 3   | 0.0039 |
| 27 | C | 20 | 33867535 | 33867535 | 20-33867535-33867535 | G | A | E1F6  | c.C505T      | p.R169X  | stopgain            | 746  | 9   | 0.0119 |
| 27 | D | 20 | 33867535 | 33867535 | 20-33867535-33867535 | G | A | E1F6  | c.C505T      | p.R169X  | stopgain            | 773  | 17  | 0.0215 |
| 27 | E | 20 | 33867535 | 33867535 | 20-33867535-33867535 | G | A | E1F6  | c.C505T      | p.R169X  | stopgain            | 1142 | 19  | 0.0164 |
| 27 | E | 20 | 33868509 | 33868509 | 20-33868509-33868509 | T | C | E1F6  | c.A317G      | p.N106S  | nonsynonymous SNV   | 1300 | 5   | 0.0038 |
| 27 | B | 20 | 33868591 | 33868591 | 20-33868591-33868591 | G | A | E1F6  | c.C235T      | p.Q79X   | stopgain            | 821  | 4   | 0.0048 |
| 27 | C | 20 | 33868591 | 33868591 | 20-33868591-33868591 | G | A | E1F6  | c.C235T      | p.Q79X   | stopgain            | 847  | 3   | 0.0035 |
| 27 | D | 20 | 33868591 | 33868591 | 20-33868591-33868591 | G | A | E1F6  | c.C235T      | p.Q79X   | stopgain            | 891  | 3   | 0.0034 |
| 27 | B | 20 | 33868633 | 33868633 | 20-33868633-33868633 | C | T | E1F6  | c.194-1G>A   |          | splicing            | 587  | 5   | 0.0084 |
| 27 | C | 20 | 33868633 | 33868633 | 20-33868633-33868633 | C | T | E1F6  | c.194-1G>A   |          | splicing            | 581  | 6   | 0.0102 |
| 27 | C | 20 | 33872073 | 33872073 | 20-33872073-33872073 | A | C | E1F6  | c.T218G      | p.V73G   | nonsynonymous SNV   | 712  | 5   | 0.007  |
| 27 | E | 20 | 33872073 | 33872073 | 20-33872073-33872073 | A | C | E1F6  | c.T218G      | p.V73G   | nonsynonymous SNV   | 1094 | 8   | 0.0073 |
| 27 | B | 20 | 33872242 | 33872242 | 20-33872242-33872242 | C | G | E1F6  | c.G49C       | p.A17P   | nonsynonymous SNV   | 890  | 7   | 0.0078 |
| 27 | C | 20 | 33872242 | 33872242 | 20-33872242-33872242 | C | G | E1F6  | c.G49C       | p.A17P   | nonsynonymous SNV   | 757  | 10  | 0.013  |
| 27 | D | 20 | 33872242 | 33872242 | 20-33872242-33872242 | C | G | E1F6  | c.G49C       | p.A17P   | nonsynonymous SNV   | 902  | 6   | 0.0066 |
| 27 | E | 20 | 33872242 | 33872242 | 20-33872242-33872242 | C | G | E1F6  | c.G49C       | p.A17P   | nonsynonymous SNV   | 1195 | 5   | 0.0042 |
| 27 | E | 20 | 33872247 | 33872247 | 20-33872247-33872247 | C | T | E1F6  | c.G44A       | p.C15Y   | nonsynonymous SNV   | 1196 | 3   | 0.0025 |
| 27 | D | 20 | 33872251 | 33872251 | 20-33872251-33872251 | C | - | E1F6  | c.A40delG    | p.G14fs  | frameshift deletion | 904  | 8   | 0.0088 |
| 27 | E | 20 | 33872251 | 33872251 | 20-33872251-33872251 | C | - | E1F6  | c.A40delG    | p.G14fs  | frameshift deletion | 1194 | 5   | 0.0042 |
| 27 | B | 17 | 7573009  | 7573009  | 17-7573009-7573009   | C | T | TP53  | c.984-1G>A   |          | splicing            | 590  | 14  | 0.0232 |
| 27 | C | 17 | 7573009  | 7573009  | 17-7573009-7573009   | C | T | TP53  | c.984-1G>A   |          | splicing            | 524  | 19  | 0.035  |
| 27 | D | 17 | 7573009  | 7573009  | 17-7573009-7573009   | C | T | TP53  | c.984-1G>A   |          | splicing            | 622  | 18  | 0.0281 |
| 27 | E | 17 | 7573009  | 7573009  | 17-7573009-7573009   | C | T | TP53  | c.984-1G>A   |          | splicing            | 888  | 14  | 0.0155 |
| 27 | B | 17 | 7577539  | 7577539  | 17-7577539-7577539   | G | A | TP53  | c.C742T      | p.R248W  | nonsynonymous SNV   | 804  | 8   | 0.0099 |
| 27 | C | 17 | 7577539  | 7577539  | 17-7577539-7577539   | G | A | TP53  | c.C742T      | p.R248W  | nonsynonymous SNV   | 774  | 8   | 0.0102 |
| 27 | D | 17 | 7577539  | 7577539  | 17-7577539-7577539   | G | A | TP53  | c.C742T      | p.R248W  | nonsynonymous SNV   | 858  | 12  | 0.0138 |
| 27 | E | 17 | 7577539  | 7577539  | 17-7577539-7577539   | G | A | TP53  | c.C742T      | p.R248W  | nonsynonymous SNV   | 1184 | 3   | 0.0025 |
| 27 | B | 17 | 7577556  | 7577556  | 17-7577556-7577556   | C | G | TP53  | c.G725C      | p.C242S  | nonsynonymous SNV   | 826  | 3   | 0.0036 |
| 27 | E | 17 | 7577556  | 7577556  | 17-7577556-7577556   | C | G | TP53  | c.G725C      | p.C242S  | nonsynonymous SNV   | 1202 | 4   | 0.0033 |
| 27 | C | 17 | 7578395  | 7578395  | 17-7578395-7578395   | G | A | TP53  | c.C535T      | p.H179Y  | nonsynonymous SNV   | 910  | 6   | 0.0066 |
| 27 | D | 17 | 7578395  | 7578395  | 17-7578395-7578395   | G | A | TP53  | c.C535T      | p.H179Y  | nonsynonymous SNV   | 964  | 13  | 0.0133 |
| 27 | E | 17 | 7578395  | 7578395  | 17-7578395-7578395   | G | A | TP53  | c.C535T      | p.H179Y  | nonsynonymous SNV   | 1281 | 8   | 0.0062 |
| 27 | E | 17 | 7578406  | 7578406  | 17-7578406-7578406   | C | T | TP53  | c.G524A      | p.R175H  | nonsynonymous SNV   | 1303 | 4   | 0.0031 |
| 27 | B | 17 | 7578532  | 7578532  | 17-7578532-7578532   | A | T | TP53  | c.T398A      | p.M133K  | nonsynonymous SNV   | 685  | 29  | 0.0406 |
| 27 | C | 17 | 7578532  | 7578532  | 17-7578532-7578532   | A | T | TP53  | c.T398A      | p.M133K  | nonsynonymous SNV   | 714  | 34  | 0.0455 |
| 27 | D | 17 | 7578532  | 7578532  | 17-7578532-7578532   | A | T | TP53  | c.T398A      | p.M133K  | nonsynonymous SNV   | 742  | 25  | 0.0326 |
| 27 | E | 17 | 7578532  | 7578532  | 17-7578532-7578532   | A | T | TP53  | c.T398A      | p.M133K  | nonsynonymous SNV   | 986  | 47  | 0.0455 |
| 27 | C | 17 | 7579310  | 7579310  | 17-7579310-7579310   | A | C | TP53  | c.258+2T>G   |          | splicing            | 676  | 3   | 0.0044 |
| 28 | A | 20 | 33867535 | 33867535 | 20-33867535-33867535 | G | A | E1F6  | c.C505T      | p.R169X  | stopgain            | 802  | 4   | 0.005  |
| 28 | A | 20 | 33872073 | 33872073 | 20-33872073-33872073 | A | C | E1F6  | c.T218G      | p.V73G   | nonsynonymous SNV   | 737  | 3   | 0.0041 |
| 28 | A | 20 | 33872242 | 33872242 | 20-33872242-33872242 | C | G | E1F6  | c.G49C       | p.A17P   | nonsynonymous SNV   | 812  | 3   | 0.0037 |
| 28 | A | 17 | 7573009  | 7573009  | 17-7573009-7573009   | C | T | TP53  | c.984-1G>A   |          | splicing            | 623  | 15  | 0.0235 |
| 28 | A | 17 | 7577539  | 7577539  | 17-7577539-7577539   | G | A | TP53  | c.C742T      | p.R248W  | nonsynonymous SNV   | 800  | 8   | 0.0099 |
| 28 | A | 17 | 7578395  | 7578395  | 17-7578395-7578395   | G | A | TP53  | c.C535T      | p.H179Y  | nonsynonymous SNV   | 845  | 26  | 0.0299 |
| 28 | A | 17 | 7578532  | 7578532  | 17-7578532-7578532   | A | T | TP53  | c.T398A      | p.M133K  | nonsynonymous SNV   | 670  | 37  | 0.0523 |
| 28 | A | 17 | 7579310  | 7579310  | 17-7579310-7579310   | A | C | TP53  | c.258+2T>G   |          | splicing            | 697  | 6   | 0.0085 |
| 29 | D | 20 | 33867481 | 33867481 | 20-33867481-33867481 | A | G | E1F6  | c.T559C      | p.C187R  | nonsynonymous SNV   | 1171 | 3   | 0.0026 |
| 29 | B | 20 | 33867755 | 33867755 | 20-33867755-33867755 | A | T | E1F6  | c.T479A      | p.V160D  | nonsynonymous SNV   | 639  | 4   | 0.0062 |
| 29 | C | 20 | 33867755 | 33867755 | 20-33867755-33867755 | A | T | E1F6  | c.T479A      | p.V160D  | nonsynonymous SNV   | 938  | 9   |        |

|    |   |    |           |           |                        |   |   |         |             |          |                     |      |     |        |
|----|---|----|-----------|-----------|------------------------|---|---|---------|-------------|----------|---------------------|------|-----|--------|
| 33 | B | 17 | 7578406   | 7578406   | 17:7578406-7578406     | C | T | TP53    | c.G524A     | p.R175H  | nonsynonymous SNV   | 1124 | 3   | 0.0027 |
| 34 | A | 20 | 33867535  | 33867535  | 20:33867535-33867535   | G | A | E1F6    | c.C505T     | p.R169X  | stopgain            | 777  | 6   | 0.0077 |
| 34 | B | 20 | 33867535  | 33867535  | 20:33867535-33867535   | G | A | E1F6    | c.C505T     | p.R169X  | stopgain            | 582  | 68  | 0.1046 |
| 34 | C | 20 | 33867535  | 33867535  | 20:33867535-33867535   | G | A | E1F6    | c.C505T     | p.R169X  | stopgain            | 561  | 40  | 0.0666 |
| 34 | D | 20 | 33867535  | 33867535  | 20:33867535-33867535   | G | A | E1F6    | c.C505T     | p.R169X  | stopgain            | 878  | 111 | 0.1122 |
| 34 | E | 20 | 33867535  | 33867535  | 20:33867535-33867535   | G | A | E1F6    | c.C505T     | p.R169X  | stopgain            | 836  | 92  | 0.0991 |
| 34 | G | 20 | 33867535  | 33867535  | 20:33867535-33867535   | G | A | E1F6    | c.C505T     | p.R169X  | stopgain            | 725  | 174 | 0.1935 |
| 34 | A | 20 | 33872021  | 33872021  | 20:33872021-33872021   | C | G | E1F6    | c.G151C     | p.A51P   | nonsynonymous SNV   | 705  | 6   | 0.0084 |
| 34 | C | 20 | 33872021  | 33872021  | 20:33872021-33872021   | C | G | E1F6    | c.G151C     | p.A51P   | nonsynonymous SNV   | 697  | 5   | 0.0071 |
| 34 | D | 20 | 33872224  | 33872224  | 20:33872224-33872224   | A | T | E1F6    | c.T67A      | p.Y23N   | nonsynonymous SNV   | 1093 | 3   | 0.0027 |
| 34 | E | 20 | 33872224  | 33872224  | 20:33872224-33872224   | A | T | E1F6    | c.T67A      | p.Y23N   | nonsynonymous SNV   | 1027 | 8   | 0.0077 |
| 34 | E | 12 | 112926852 | 112926852 | 12:112926852-112926852 | C | T | PTPN11  | c.C1472T    | p.P491L  | nonsynonymous SNV   | 1065 | 3   | 0.0028 |
| 35 | A | 20 | 33867402  | 33867402  | 20:33867402-33867402   | A | - | E1F6    | c.G38delT   | p.I213fs | frameshift deletion | 714  | 5   | 0.007  |
| 35 | A | 20 | 33867905  | 33867905  | 20:33867905-33867905   | A | - | E1F6    | c.G29delT   | p.L110fs | frameshift deletion | 597  | 15  | 0.0245 |
| 35 | A | 20 | 33868540  | 33868540  | 20:33868540-33868540   | G | A | E1F6    | c.C286T     | p.R96W   | nonsynonymous SNV   | 700  | 33  | 0.045  |
| 35 | A | 20 | 33868621  | 33868621  | 20:33868621-33868621   | C | T | E1F6    | p.G69S      | p.G69S   | nonsynonymous SNV   | 554  | 31  | 0.053  |
| 35 | A | 17 | 7577539   | 7577539   | 17:7577539-7577539     | G | A | TP53    | c.C742T     | p.R248W  | nonsynonymous SNV   | 680  | 10  | 0.0145 |
| 36 | A | 20 | 33867809  | 33867809  | 20:33867809-33867809   | A | C | E1F6    | c.T425G     | p.V142G  | nonsynonymous SNV   | 812  | 4   | 0.0049 |
| 36 | 3 | 20 | 33867809  | 33867809  | 20:33867809-33867809   | A | C | E1F6    | c.T425G     | p.V142G  | nonsynonymous SNV   | 1523 | 6   | 0.0039 |
| 36 | A | 20 | 33867888  | 33867888  | 20:33867888-33867888   | C | T | E1F6    | c.G346A     | p.V116M  | nonsynonymous SNV   | 697  | 5   | 0.0071 |
| 36 | 1 | 20 | 33867888  | 33867888  | 20:33867888-33867888   | C | T | E1F6    | c.G346A     | p.V116M  | nonsynonymous SNV   | 867  | 7   | 0.008  |
| 36 | 3 | 20 | 33867888  | 33867888  | 20:33867888-33867888   | C | T | E1F6    | c.G346A     | p.V116M  | nonsynonymous SNV   | 1205 | 11  | 0.009  |
| 36 | 3 | 20 | 33868588  | 33868588  | 20:33868588-33868588   | C | A | E1F6    | c.G238T     | p.E80X   | stopgain            | 1429 | 5   | 0.0035 |
| 36 | 3 | 17 | 7578406   | 7578406   | 17:7578406-7578406     | C | T | TP53    | c.G524A     | p.R175H  | nonsynonymous SNV   | 2178 | 3   | 0.0014 |
| 36 | 3 | 17 | 7578526   | 7578526   | 17:7578526-7578526     | C | T | TP53    | c.G404A     | p.C135Y  | nonsynonymous SNV   | 1920 | 3   | 0.0016 |
| 38 | C | 20 | 33868509  | 33868509  | 20:33868509-33868509   | T | C | E1F6    | c.A317G     | p.N106S  | nonsynonymous SNV   | 853  | 3   | 0.0035 |
| 38 | G | 20 | 33868509  | 33868509  | 20:33868509-33868509   | T | C | E1F6    | c.A317G     | p.N106S  | nonsynonymous SNV   | 1430 | 5   | 0.0035 |
| 38 | A | 20 | 33868621  | 33868621  | 20:33868621-33868621   | C | T | E1F6    | p.G69S      | p.G69S   | nonsynonymous SNV   | 543  | 11  | 0.0199 |
| 38 | B | 20 | 33868621  | 33868621  | 20:33868621-33868621   | C | T | E1F6    | c.G205A     | p.G69S   | nonsynonymous SNV   | 630  | 12  | 0.0187 |
| 38 | C | 20 | 33868621  | 33868621  | 20:33868621-33868621   | C | T | E1F6    | c.G205A     | p.G69S   | nonsynonymous SNV   | 666  | 8   | 0.0119 |
| 38 | D | 20 | 33868621  | 33868621  | 20:33868621-33868621   | C | T | E1F6    | c.G205A     | p.G69S   | nonsynonymous SNV   | 580  | 11  | 0.0186 |
| 38 | E | 20 | 33868621  | 33868621  | 20:33868621-33868621   | C | T | E1F6    | c.G205A     | p.G69S   | nonsynonymous SNV   | 583  | 11  | 0.0185 |
| 38 | G | 20 | 33868621  | 33868621  | 20:33868621-33868621   | C | T | E1F6    | c.G205A     | p.G69S   | nonsynonymous SNV   | 1093 | 13  | 0.0118 |
| 38 | H | 20 | 33868621  | 33868621  | 20:33868621-33868621   | C | T | E1F6    | c.G205A     | p.G69S   | nonsynonymous SNV   | 614  | 5   | 0.0081 |
| 38 | I | 20 | 33868621  | 33868621  | 20:33868621-33868621   | C | T | E1F6    | c.G205A     | p.G69S   | nonsynonymous SNV   | 703  | 7   | 0.0099 |
| 38 | H | 20 | 33872257  | 33872257  | 20:33872257-33872257   | C | T | E1F6    | c.G34A      | p.E12K   | nonsynonymous SNV   | 770  | 4   | 0.0052 |
| 38 | B | 12 | 112884198 | 112884198 | 12:112884198-112884198 | G | C | PTPN11  | c.G133C     | p.V45L   | nonsynonymous SNV   | 829  | 3   | 0.0036 |
| 38 | C | 17 | 7578455   | 7578455   | 17:7578455-7578455     | C | G | TP53    | c.G475C     | p.A159P  | nonsynonymous SNV   | 908  | 4   | 0.0044 |
| 38 | H | 17 | 7578455   | 7578455   | 17:7578455-7578455     | C | G | TP53    | c.G475C     | p.A159P  | nonsynonymous SNV   | 949  | 3   | 0.0032 |
| 39 | G | 2  | 25457191  | 25457191  | 2:25457191-25457191    | C | T | DNMT3A  | c.G2696A    | p.R899H  | nonsynonymous SNV   | 844  | 4   | 0.0047 |
| 40 | 1 | 20 | 31023408  | 31023408  | 20:31023408-31023408   | C | T | ASXL1   | c.C2893T    | p.R965X  | stopgain            | 1928 | 3   | 0.0016 |
| 40 | 1 | 5  | 148892675 | 148892675 | 5:148892675-148892675  | G | A | CSNK1A1 | c.C638T     | p.A213V  | nonsynonymous SNV   | 1864 | 5   | 0.0027 |
| 40 | 2 | 5  | 148892675 | 148892675 | 5:148892675-148892675  | G | A | CSNK1A1 | c.C638T     | p.A213V  | nonsynonymous SNV   | 1795 | 4   | 0.0022 |
| 40 | 2 | 20 | 33867517  | 33867517  | 20:33867517-33867517   | C | T | E1F6    | c.G523A     | p.A175T  | nonsynonymous SNV   | 1962 | 3   | 0.0015 |
| 40 | 1 | 20 | 33868509  | 33868509  | 20:33868509-33868509   | T | C | E1F6    | c.A317G     | p.N106S  | nonsynonymous SNV   | 2152 | 10  | 0.0046 |
| 40 | 2 | 20 | 33868509  | 33868509  | 20:33868509-33868509   | T | C | E1F6    | c.A317G     | p.N106S  | nonsynonymous SNV   | 2067 | 6   | 0.0029 |
| 40 | 1 | 12 | 22811995  | 22811995  | 12:22811995-22811995   | A | G | ETNK1   | c.A731G     | p.N244S  | nonsynonymous SNV   | 1660 | 144 | 0.0798 |
| 40 | 2 | 12 | 22811995  | 22811995  | 12:22811995-22811995   | A | G | ETNK1   | c.A731G     | p.N244S  | nonsynonymous SNV   | 1644 | 159 | 0.0882 |
| 40 | 2 | 3  | 128202795 | 128202795 | 3:128202795-128202795  | C | T | GATA2   | c.G925A     | p.D309N  | nonsynonymous SNV   | 1783 | 20  | 0.0111 |
| 41 | A | 20 | 33867535  | 33867535  | 20:33867535-33867535   | G | A | E1F6    | c.C505T     | p.R169X  | stopgain            | 856  | 3   | 0.0035 |
| 41 | A | 20 | 33867816  | 33867816  | 20:33867816-33867816   | C | T | E1F6    | c.G418A     | p.G140R  | nonsynonymous SNV   | 957  | 5   | 0.0052 |
| 41 | A | 20 | 33867888  | 33867888  | 20:33867888-33867888   | C | T | E1F6    | c.G346A     | p.V116M  | nonsynonymous SNV   | 883  | 4   | 0.0045 |
| 41 | A | 20 | 33868540  | 33868540  | 20:33868540-33868540   | G | A | E1F6    | c.C286T     | p.R96W   | nonsynonymous SNV   | 904  | 12  | 0.0131 |
| 41 | B | 20 | 33868589  | 33868589  | 20:33868589-33868589   | C | - | E1F6    | c.237delG   | p.Q79fs  | frameshift deletion | 1356 | 3   | 0.0022 |
| 41 | A | 17 | 7577094   | 7577094   | 17:7577094-7577094     | G | A | TP53    | c.C844T     | p.R282W  | nonsynonymous SNV   | 851  | 5   | 0.0058 |
| 41 | B | 17 | 7578190   | 7578190   | 17:7578190-7578190     | T | C | TP53    | c.A659G     | p.Y220C  | nonsynonymous SNV   | 887  | 13  | 0.0144 |
| 41 | C | 17 | 7578190   | 7578190   | 17:7578190-7578190     | T | C | TP53    | c.A659G     | p.Y220C  | nonsynonymous SNV   | 734  | 4   | 0.0054 |
| 41 | B | 17 | 7578454   | 7578454   | 17:7578454-7578454     | G | A | TP53    | c.C476T     | p.A159V  | nonsynonymous SNV   | 1262 | 3   | 0.0024 |
| 42 | C | 20 | 33867841  | 33867841  | 20:33867841-33867841   | G | C | E1F6    | c.C393G     | p.S131R  | nonsynonymous SNV   | 1311 | 4   | 0.003  |
| 42 | H | 20 | 33872006  | 33872006  | 20:33872006-33872006   | A | G | E1F6    | p.T166C     | p.C56R   | nonsynonymous SNV   | 892  | 4   | 0.0045 |
| 42 | D | 17 | 7578190   | 7578190   | 17:7578190-7578190     | T | C | TP53    | c.A659G     | p.Y220C  | nonsynonymous SNV   | 779  | 6   | 0.0076 |
| 43 | C | 2  | 25457290  | 25457290  | 2:25457290-25457290    | C | G | DNMT3A  | c.2142-1G>C |          | splicing            | 1173 | 5   | 0.0042 |
| 43 | A | 20 | 33867773  | 33867773  | 20:33867773-33867773   | A | G | E1F6    | c.T461C     | p.L154P  | nonsynonymous SNV   | 892  | 10  | 0.0111 |
| 43 | A | 20 | 33867893  | 33867893  | 20:33867893-33867893   | A | G | E1F6    | c.T341C     | p.L114P  | nonsynonymous SNV   | 881  | 4   | 0.0045 |
| 43 | B | 20 | 33867893  | 33867893  | 20:33867893-33867893   | A | G | E1F6    | c.T341C     | p.L114P  | nonsynonymous SNV   | 840  | 10  | 0.0118 |
| 43 | C | 20 | 33867893  | 33867893  | 20:33867893-33867893   | A | G | E1F6    | c.T341C     | p.L114P  | nonsynonymous SNV   | 1580 | 14  | 0.0088 |
| 43 | A | 20 | 33867905  | 33867905  | 20:33867905-33867905   | A | T | E1F6    | c.T329A     | p.L110Q  | nonsynonymous SNV   | 810  | 3   | 0.0037 |
| 43 | B | 20 | 33868494  | 33868494  | 20:33868494-33868494   | T | C | E1F6    | c.A332G     | p.N111S  | nonsynonymous SNV   | 910  | 8   | 0.0087 |
| 43 | C | 20 | 33868494  | 33868494  | 20:33868494-33868494   | T | C | E1F6    | c.A332G     | p.N111S  | nonsynonymous SNV   | 1877 | 22  | 0.0116 |
| 43 | C | 20 | 33868620  | 33868620  | 20:33868620-33868620   | C | A | E1F6    | p.G69V      | p.G69V   | nonsynonymous SNV   | 1526 | 4   | 0.0026 |
| 43 | C | 17 | 7573925   | 7573925   | 17:7573925-7573925     | A | C | TP53    | c.983+2T>G  |          | splicing            | 1357 | 3   | 0.0022 |
| 43 | C | 17 | 7577121   | 7577121   | 17:7577121-7577121     | G | A | TP53    | c.C817T     | p.R273C  | nonsynonymous SNV   | 1899 | 3   | 0.0016 |
| 43 | A | 17 | 7578392   | 7578392   | 17:7578392-7578392     | C | T | TP53    | c.G538A     | p.E180K  | nonsynonymous SNV   | 956  | 3   | 0.0031 |
| 43 | B | 17 | 7578392   | 7578392   | 17:7578392-7578392     | C | T | TP53    | c.G538A     | p.E180K  | nonsynonymous SNV   | 915  | 4   | 0.0044 |
| 43 | C | 17 | 7578392   | 7578392   | 17:7578392-7578392     | C | T | TP53    | c.G538A     | p.E180K  | nonsynonymous SNV   | 2076 | 3   | 0.0014 |
| 43 | C | 17 | 7578448   | 7578448   | 17:7578448-7578448     | G | T | TP53    | c.C482A     | p.A161D  | nonsynonymous SNV   | 2037 | 3   | 0.0015 |
| 43 | A | 17 | 7578517   | 7578517   | 17:7578517-7578517     | G | A | TP53    | c.C413T     | p.A138V  | nonsynonymous SNV   | 843  | 7   | 0.0082 |
| 43 | B | 17 | 7578517   | 7578517   | 17:7578517-7578517     | G | A | TP53    | c.C413T     | p.A138V  | nonsynonymous SNV   | 865  | 7   | 0.008  |
| 43 | C | 17 | 7578517   | 7578517   | 17:7578517-7578517     | G | A | TP53    | c.C413T     | p.A138V  | nonsynonymous SNV   | 1766 | 26  | 0.0145 |
| 45 | E | 20 | 33868478  | 33868478  | 20:33868478-33868478   | C | - | E1F6    | c.348delG   | p.L116fs | frameshift deletion | 762  | 3   | 0.0039 |
| 45 | D | 20 | 33868549  | 33868549  | 20:33868549-33868549   | G | A | E1F6    | c.C277T     | p.Q93X   | stopgain            | 980  | 5   | 0.0051 |
| 45 | E | 20 | 33868549  | 33868549  | 20:33868549-33868549   | G | A | E1F6    | c.C277T     | p.Q93X   | stopgain            | 860  | 3   | 0.0035 |
| 45 | E | 20 | 33868588  | 33868588  | 20:33868588-33868588   | C | T | E1F6    | c.G238A     | p.E80K   | nonsynonymous SNV   | 868  | 3   | 0.0034 |
| 45 | C | 20 | 33872274  | 33872274  | 20:33872274-33872274   | G | T | E1F6    | c.C17A      | p.S6X    | stopgain            | 876  | 4   |        |

|    |   |    |          |          |                      |   |   |       |              |              |                        |      |     |        |
|----|---|----|----------|----------|----------------------|---|---|-------|--------------|--------------|------------------------|------|-----|--------|
| 48 | A | 20 | 33868621 | 33868621 | 20:33868621-33868621 | C | T | EIF6  | c.G205A      | p.G69S       | nonsynonymous SNV      | 607  | 83  | 0.1203 |
| 48 | B | 20 | 33868621 | 33868621 | 20:33868621-33868621 | C | T | EIF6  | c.G205A      | p.G69S       | nonsynonymous SNV      | 509  | 68  | 0.1179 |
| 48 | Z | 20 | 33868621 | 33868621 | 20:33868621-33868621 | C | T | EIF6  | c.G205A      | p.G69S       | nonsynonymous SNV      | 572  | 39  | 0.0638 |
| 48 | 1 | 20 | 33868621 | 33868621 | 20:33868621-33868621 | C | T | EIF6  | c.G205A      | p.G69S       | nonsynonymous SNV      | 1402 | 121 | 0.0794 |
| 48 | 2 | 20 | 33868621 | 33868621 | 20:33868621-33868621 | C | T | EIF6  | c.G205A      | p.G69S       | nonsynonymous SNV      | 1566 | 81  | 0.0492 |
| 48 | 4 | 20 | 33868621 | 33868621 | 20:33868621-33868621 | C | T | EIF6  | c.G205A      | p.G69S       | nonsynonymous SNV      | 1781 | 139 | 0.0724 |
| 48 | 6 | 20 | 33868621 | 33868621 | 20:33868621-33868621 | C | T | EIF6  | c.G205A      | p.G69S       | nonsynonymous SNV      | 1482 | 161 | 0.098  |
| 48 | 6 | 20 | 33868627 | 33868627 | 20:33868627-33868627 | T | A | EIF6  | c.A199T      | p.R67W       | nonsynonymous SNV      | 1523 | 3   | 0.002  |
| 48 | 6 | 20 | 33868633 | 33868633 | 20:33868633-33868633 | C | T | EIF6  | c.194-1G>A   |              | splicing               | 1419 | 4   | 0.0028 |
| 48 | 4 | 20 | 33872034 | 33872034 | 20:33872034-33872034 | G | - | EIF6  | c.257delC    | p.S86fs      | frameshift deletion    | 2272 | 12  | 0.0053 |
| 48 | 6 | 20 | 33872034 | 33872034 | 20:33872034-33872034 | G | - | EIF6  | c.257delC    | p.S86fs      | frameshift deletion    | 1949 | 5   | 0.0026 |
| 48 | 2 | 20 | 33872253 | 33872253 | 20:33872253-33872253 | A | T | EIF6  | c.T38A       | p.I13N       | nonsynonymous SNV      | 2071 | 6   | 0.0029 |
| 48 | 6 | 20 | 33872260 | 33872260 | 20:33872260-33872260 | O | - | EIF6  | c.29_31del   | p.I0_11del   | nonframeshift deletion | 2008 | 6   | 0.003  |
| 48 | 6 | 17 | 1565303  | 1565303  | 17:1565303-1565303   | T | C | PRPF8 | c.A3919G     | p.M1307V     | nonsynonymous SNV      | 2141 | 4   | 0.0019 |
| 48 | 6 | 7  | 66459210 | 66459210 | 7:66459210-66459210  | T | C | SBD5  | c.A247G      | p.R83V       | nonsynonymous SNV      | 602  | 3   | 0.005  |
| 48 | 6 | 7  | 66460343 | 66460343 | 7:66460343-66460343  | T | C | SBD5  | c.A62G       | p.K21R       | nonsynonymous SNV      | 2106 | 3   | 0.0014 |
| 48 | 6 | 17 | 7577108  | 7577108  | 17:7577108-7577108   | C | T | TP53  | c.G830A      | p.C277Y      | nonsynonymous SNV      | 2285 | 4   | 0.0017 |
| 48 | 6 | 17 | 7577120  | 7577120  | 17:7577120-7577120   | C | T | TP53  | c.G818A      | p.R273H      | nonsynonymous SNV      | 2133 | 4   | 0.0019 |
| 48 | 2 | 17 | 7577511  | 7577511  | 17:7577511-7577511   | A | C | TP53  | c.T770G      | p.L257R      | nonsynonymous SNV      | 1444 | 5   | 0.0035 |
| 48 | 4 | 17 | 7577511  | 7577511  | 17:7577511-7577511   | A | C | TP53  | c.T770G      | p.L257R      | nonsynonymous SNV      | 1756 | 11  | 0.0062 |
| 48 | 6 | 17 | 7577511  | 7577511  | 17:7577511-7577511   | A | C | TP53  | c.T770G      | p.L257R      | nonsynonymous SNV      | 1535 | 21  | 0.0135 |
| 48 | A | 17 | 7577539  | 7577539  | 17:7577539-7577539   | G | A | TP53  | c.C742T      | p.R248W      | nonsynonymous SNV      | 748  | 32  | 0.041  |
| 48 | B | 17 | 7577539  | 7577539  | 17:7577539-7577539   | G | A | TP53  | c.C742T      | p.R248W      | nonsynonymous SNV      | 668  | 14  | 0.0205 |
| 48 | Z | 17 | 7577539  | 7577539  | 17:7577539-7577539   | G | A | TP53  | c.C742T      | p.R248W      | nonsynonymous SNV      | 817  | 12  | 0.0145 |
| 48 | 1 | 17 | 7577539  | 7577539  | 17:7577539-7577539   | G | A | TP53  | c.C742T      | p.R248W      | nonsynonymous SNV      | 1510 | 85  | 0.0533 |
| 48 | 2 | 17 | 7577539  | 7577539  | 17:7577539-7577539   | G | A | TP53  | c.C742T      | p.R248W      | nonsynonymous SNV      | 1754 | 53  | 0.0293 |
| 48 | 4 | 17 | 7577539  | 7577539  | 17:7577539-7577539   | G | A | TP53  | c.C742T      | p.R248W      | nonsynonymous SNV      | 2105 | 63  | 0.0291 |
| 48 | 6 | 17 | 7577539  | 7577539  | 17:7577539-7577539   | G | A | TP53  | c.C742T      | p.R248W      | nonsynonymous SNV      | 1878 | 57  | 0.0295 |
| 48 | B | 17 | 7577556  | 7577556  | 17:7577556-7577556   | C | A | TP53  | c.G725T      | p.C242F      | nonsynonymous SNV      | 654  | 28  | 0.0411 |
| 48 | C | 17 | 7577556  | 7577556  | 17:7577556-7577556   | C | A | TP53  | c.G725T      | p.C242F      | nonsynonymous SNV      | 46   | 20  | 0.303  |
| 48 | 2 | 17 | 7577556  | 7577556  | 17:7577556-7577556   | C | A | TP53  | c.G725T      | p.C242F      | nonsynonymous SNV      | 1807 | 3   | 0.0017 |
| 48 | 4 | 17 | 7577556  | 7577556  | 17:7577556-7577556   | C | A | TP53  | c.G725T      | p.C242F      | nonsynonymous SNV      | 2100 | 15  | 0.0071 |
| 48 | 6 | 17 | 7577556  | 7577556  | 17:7577556-7577556   | C | A | TP53  | c.G725T      | p.C242F      | nonsynonymous SNV      | 1775 | 129 | 0.0678 |
| 48 | 6 | 17 | 7578203  | 7578203  | 17:7578203-7578203   | C | T | TP53  | c.G646A      | p.V216M      | nonsynonymous SNV      | 1760 | 5   | 0.0028 |
| 48 | 4 | 17 | 7579358  | 7579358  | 17:7579358-7579358   | C | A | TP53  | c.G329T      | p.R110L      | nonsynonymous SNV      | 2558 | 3   | 0.0012 |
| 48 | 6 | 17 | 7579358  | 7579358  | 17:7579358-7579358   | C | A | TP53  | c.G329T      | p.R110L      | nonsynonymous SNV      | 2136 | 9   | 0.0042 |
| 49 | A | 20 | 33867743 | 33867743 | 20:33867743-33867743 | A | C | EIF6  | c.489+2T>G   |              | splicing               | 622  | 20  | 0.0312 |
| 49 | B | 20 | 33867743 | 33867743 | 20:33867743-33867743 | A | C | EIF6  | c.489+2T>G   |              | splicing               | 448  | 9   | 0.0197 |
| 49 | C | 20 | 33867743 | 33867743 | 20:33867743-33867743 | A | C | EIF6  | c.489+2T>G   |              | splicing               | 610  | 5   | 0.0081 |
| 49 | D | 20 | 33867743 | 33867743 | 20:33867743-33867743 | A | C | EIF6  | c.489+2T>G   |              | splicing               | 422  | 12  | 0.0276 |
| 49 | E | 20 | 33867743 | 33867743 | 20:33867743-33867743 | A | C | EIF6  | c.489+2T>G   |              | splicing               | 531  | 14  | 0.0257 |
| 49 | G | 20 | 33867743 | 33867743 | 20:33867743-33867743 | A | C | EIF6  | c.489+2T>G   |              | splicing               | 677  | 4   | 0.0045 |
| 49 | H | 20 | 33867743 | 33867743 | 20:33867743-33867743 | A | C | EIF6  | c.489+2T>G   |              | splicing               | 899  | 9   | 0.0127 |
| 49 | I | 20 | 33867743 | 33867743 | 20:33867743-33867743 | A | C | EIF6  | c.489+2T>G   |              | splicing               | 368  | 3   | 0.0081 |
| 49 | Z | 20 | 33867743 | 33867743 | 20:33867743-33867743 | A | C | EIF6  | c.489+2T>G   |              | splicing               | 577  | 25  | 0.0415 |
| 49 | G | 20 | 33867758 | 33867758 | 20:33867758-33867758 | O | - | EIF6  | c.474_476del | p.158_159del | nonframeshift deletion | 967  | 5   | 0.0051 |
| 49 | E | 20 | 33867758 | 33867758 | 20:33867758-33867758 | O | - | EIF6  | c.474_476del | p.158_159del | nonframeshift deletion | 614  | 4   | 0.0065 |
| 49 | A | 20 | 33867758 | 33867758 | 20:33867758-33867758 | O | - | EIF6  | c.474_476del | p.158_159del | nonframeshift deletion | 690  | 3   | 0.0043 |
| 49 | Z | 20 | 33867758 | 33867758 | 20:33867758-33867758 | O | - | EIF6  | c.474_476del | p.158_159del | nonframeshift deletion | 674  | 7   | 0.0103 |
| 49 | H | 20 | 33867758 | 33867758 | 20:33867758-33867758 | O | - | EIF6  | c.474_476del | p.158_159del | nonframeshift deletion | 805  | 4   | 0.0049 |
| 49 | C | 20 | 33867758 | 33867758 | 20:33867758-33867758 | O | - | EIF6  | c.474_476del | p.158_159del | nonframeshift deletion | 674  | 3   | 0.0044 |
| 49 | D | 20 | 33867758 | 33867758 | 20:33867758-33867758 | O | - | EIF6  | c.474_476del | p.158_159del | nonframeshift deletion | 497  | 3   | 0.006  |
| 49 | A | 20 | 33868461 | 33868461 | 20:33868461-33868461 | T | A | EIF6  | c.A365T      | p.D122V      | nonsynonymous SNV      | 693  | 7   | 0.01   |
| 49 | B | 20 | 33868461 | 33868461 | 20:33868461-33868461 | T | A | EIF6  | c.A365T      | p.D122V      | nonsynonymous SNV      | 491  | 3   | 0.0061 |
| 49 | Z | 20 | 33868461 | 33868461 | 20:33868461-33868461 | T | A | EIF6  | c.A365T      | p.D122V      | nonsynonymous SNV      | 698  | 6   | 0.0085 |
| 49 | Z | 20 | 33868491 | 33868491 | 20:33868491-33868491 | T | A | EIF6  | c.A335T      | p.D112V      | nonsynonymous SNV      | 855  | 4   | 0.0047 |
| 49 | D | 20 | 33871990 | 33871990 | 20:33871990-33871990 | C | T | EIF6  | c.G301A      | p.A101T      | nonsynonymous SNV      | 509  | 4   | 0.0078 |
| 49 | E | 20 | 33871990 | 33871990 | 20:33871990-33871990 | C | T | EIF6  | c.G301A      | p.A101T      | nonsynonymous SNV      | 574  | 9   | 0.0154 |
| 49 | G | 20 | 33871990 | 33871990 | 20:33871990-33871990 | C | T | EIF6  | c.G301A      | p.A101T      | nonsynonymous SNV      | 925  | 9   | 0.0096 |
| 49 | H | 20 | 33871990 | 33871990 | 20:33871990-33871990 | C | T | EIF6  | c.G301A      | p.A101T      | nonsynonymous SNV      | 797  | 12  | 0.0148 |
| 49 | I | 20 | 33871990 | 33871990 | 20:33871990-33871990 | C | T | EIF6  | c.G301A      | p.A101T      | nonsynonymous SNV      | 431  | 9   | 0.0205 |
| 49 | B | 17 | 1565301  | 1565301  | 17:1565301-1565301   | C | T | PRPF8 | c.G3921A     | p.M1307I     | nonsynonymous SNV      | 568  | 4   | 0.007  |
| 49 | B | 17 | 1565303  | 1565303  | 17:1565303-1565303   | T | C | PRPF8 | c.A3919G     | p.M1307V     | nonsynonymous SNV      | 569  | 4   | 0.007  |
| 49 | C | 17 | 1565303  | 1565303  | 17:1565303-1565303   | T | C | PRPF8 | c.A3919G     | p.M1307V     | nonsynonymous SNV      | 791  | 5   | 0.0063 |
| 49 | D | 17 | 1565303  | 1565303  | 17:1565303-1565303   | T | C | PRPF8 | c.A3919G     | p.M1307V     | nonsynonymous SNV      | 577  | 7   | 0.012  |
| 49 | E | 17 | 1565303  | 1565303  | 17:1565303-1565303   | T | C | PRPF8 | c.A3919G     | p.M1307V     | nonsynonymous SNV      | 684  | 8   | 0.0116 |
| 49 | G | 17 | 1565303  | 1565303  | 17:1565303-1565303   | T | C | PRPF8 | c.A3919G     | p.M1307V     | nonsynonymous SNV      | 1070 | 14  | 0.0129 |
| 49 | H | 17 | 1565303  | 1565303  | 17:1565303-1565303   | T | C | PRPF8 | c.A3919G     | p.M1307V     | nonsynonymous SNV      | 1025 | 5   | 0.0049 |
| 49 | I | 17 | 1565303  | 1565303  | 17:1565303-1565303   | T | C | PRPF8 | c.A3919G     | p.M1307V     | nonsynonymous SNV      | 471  | 3   | 0.0063 |
| 49 | A | 17 | 7577156  | 7577156  | 17:7577156-7577156   | C | T | TP53  | c.666-1G>A   |              | splicing               | 639  | 9   | 0.0139 |
| 49 | B | 17 | 7577156  | 7577156  | 17:7577156-7577156   | C | T | TP53  | c.666-1G>A   |              | splicing               | 429  | 4   | 0.0092 |
| 49 | A | 17 | 7578413  | 7578413  | 17:7578413-7578413   | C | A | TP53  | c.G517T      | p.V173L      | nonsynonymous SNV      | 930  | 3   | 0.0032 |
| 49 | A | 17 | 7579350  | 7579350  | 17:7579350-7579350   | A | C | TP53  | c.T337G      | p.F113V      | nonsynonymous SNV      | 843  | 8   | 0.0094 |
| 49 | B | 17 | 7579350  | 7579350  | 17:7579350-7579350   | A | C | TP53  | c.T337G      | p.F113V      | nonsynonymous SNV      | 575  | 6   | 0.0103 |
| 49 | C | 17 | 7579350  | 7579350  | 17:7579350-7579350   | A | C | TP53  | c.T337G      | p.F113V      | nonsynonymous SNV      | 846  | 8   | 0.0094 |
| 49 | D | 17 | 7579350  | 7579350  | 17:7579350-7579350   | A | C | TP53  | c.T337G      | p.F113V      | nonsynonymous SNV      | 642  | 5   | 0.0077 |
| 49 | E | 17 | 7579350  | 7579350  | 17:7579350-7579350   | A | C | TP53  | c.T337G      | p.F113V      | nonsynonymous SNV      | 689  | 7   | 0.0101 |
| 49 | G | 17 | 7579350  | 7579350  | 17:7579350-7579350   | A | C | TP53  | c.T337G      | p.F113V      | nonsynonymous SNV      | 1129 | 9   | 0.0079 |
| 49 | H | 17 | 7579350  | 7579350  | 17:7579350-7579350   | A | C | TP53  | c.T337G      | p.F113V      | nonsynonymous SNV      | 1079 | 12  | 0.011  |
| 49 | I | 17 | 7579350  | 7579350  | 17:7579350-7579350   | A | C | TP53  | c.T337G      | p.F113V      | nonsynonymous SNV      | 523  | 3   | 0.0057 |
| 49 | Z | 17 | 7579350  | 7579350  | 17:7579350-7579350   | A | C | TP53  | c.T337G      | p.F113V      | nonsynonymous SNV      | 821  | 14  | 0.0168 |
| 50 | A | 20 | 33867535 | 33867535 | 20:33867535-33867535 | G | A | EIF6  | c.C505T      | p.R169X      | stopgain               | 889  | 19  | 0.0209 |
| 50 | B | 20 | 33867535 | 33867535 | 20:33867535-33867535 | G | A | EIF6  | c.C505T      | p.R169X      | stopgain               | 515  | 14  | 0.0265 |
| 50 | C | 20 | 33867535 | 33867535 | 20:33867535-33867535 | G | A | EIF6  | c.C505T      | p.R169X      | stopgain               | 860  | 20  | 0.0227 |
| 50 | A | 20 | 33867793 | 33867793 |                      |   |   |       |              |              |                        |      |     |        |

|    |   |    |           |           |                       |   |   |         |               |                   |                        |      |        |        |
|----|---|----|-----------|-----------|-----------------------|---|---|---------|---------------|-------------------|------------------------|------|--------|--------|
| 51 | C | 20 | 33868509  | 33868509  | 20:33868509-33868509  | T | C | E1F6    | c.A317G       | p.N106S           | nonsynonymous SNV      | 1056 | 6      | 0.0056 |
| 51 | A | 20 | 33868540  | 33868540  | 20:33868540-33868540  | G | A | E1F6    | c.C286T       | p.R96W            | nonsynonymous SNV      | 807  | 4      | 0.0049 |
| 51 | C | 20 | 33868540  | 33868540  | 20:33868540-33868540  | G | A | E1F6    | c.C286T       | p.R96W            | nonsynonymous SNV      | 1053 | 3      | 0.0028 |
| 51 | A | 20 | 33872236  | 33872236  | 20:33872236-33872236  | G | A | E1F6    | c.C55T        | p.L19F            | nonsynonymous SNV      | 933  | 10     | 0.0106 |
| 51 | B | 20 | 33872236  | 33872236  | 20:33872236-33872236  | G | A | E1F6    | c.C55T        | p.L19F            | nonsynonymous SNV      | 983  | 9      | 0.0091 |
| 51 | C | 20 | 33872236  | 33872236  | 20:33872236-33872236  | G | A | E1F6    | c.C55T        | p.L19F            | nonsynonymous SNV      | 950  | 3      | 0.0031 |
| 51 | B | 20 | 33872239  | 33872239  | 20:33872239-33872239  | T | - | E1F6    | c.S2deIA      | p.K18fs           | frameshift deletion    | 997  | 3      | 0.003  |
| 51 | C | 20 | 33872239  | 33872239  | 20:33872239-33872239  | T | - | E1F6    | c.S2deIA      | p.K18fs           | frameshift deletion    | 942  | 4      | 0.0042 |
| 51 | B | 7  | 66459201  | 66459201  | 7:66459201-66459201   | G | T | SBD5    | c.C256A       | p.Q86K            | nonsynonymous SNV      | 200  | 11     | 0.0521 |
| 51 | C | 7  | 66459201  | 66459201  | 7:66459201-66459201   | G | T | SBD5    | c.C256A       | p.Q86K            | nonsynonymous SNV      | 200  | 39     | 0.1632 |
| 51 | A | 17 | 7577580   | 7577580   | 17:7577580-7577580    | T | C | TP53    | c.A701G       | p.Y234C           | nonsynonymous SNV      | 658  | 3      | 0.0045 |
| 52 | H | 20 | 33867536  | 33867536  | 20:33867536-33867536  | G | T | E1F6    | c.C504A       | p.N168K           | nonsynonymous SNV      | 1317 | 4      | 0.003  |
| 52 | H | 20 | 33867782  | 33867782  | 20:33867782-33867782  | T | - | E1F6    | c.452delA     | p.Q151fs          | frameshift deletion    | 1458 | 6      | 0.0041 |
| 52 | G | 20 | 33872052  | 33872052  | 20:33872052-33872052  | - | C | E1F6    | c.238dupG     | p.A80fs           | frameshift insertion   | 922  | 3      | 0.0032 |
| 53 | B | 20 | 33868495  | 33868495  | 20:33868495-33868495  | T | G | E1F6    | c.A331C       | p.N111H           | nonsynonymous SNV      | 622  | 8      | 0.0127 |
| 53 | A | 20 | 33868540  | 33868540  | 20:33868540-33868540  | G | A | E1F6    | c.C286T       | p.R96W            | nonsynonymous SNV      | 1133 | 5      | 0.0044 |
| 53 | B | 20 | 33868540  | 33868540  | 20:33868540-33868540  | G | A | E1F6    | c.C286T       | p.R96W            | nonsynonymous SNV      | 668  | 4      | 0.006  |
| 53 | C | 20 | 33868540  | 33868540  | 20:33868540-33868540  | G | A | E1F6    | p.R96W        | nonsynonymous SNV | 982                    | 6    | 0.0061 |        |
| 53 | D | 20 | 33868540  | 33868540  | 20:33868540-33868540  | G | A | E1F6    | c.C286T       | p.R96W            | nonsynonymous SNV      | 1106 | 6      | 0.0054 |
| 53 | E | 20 | 33868540  | 33868540  | 20:33868540-33868540  | G | A | E1F6    | p.R96W        | nonsynonymous SNV | 1319                   | 11   | 0.0083 |        |
| 53 | D | 20 | 33871990  | 33871990  | 20:33871990-33871990  | C | T | E1F6    | c.G301A       | p.A101T           | nonsynonymous SNV      | 856  | 3      | 0.0035 |
| 53 | B | 20 | 33872005  | 33872005  | 20:33872005-33872005  | C | T | E1F6    | c.G286A       | p.A96T            | nonsynonymous SNV      | 639  | 4      | 0.0062 |
| 53 | E | 20 | 33872035  | 33872035  | 20:33872035-33872035  | A | C | E1F6    | c.T256G       | p.S86A            | nonsynonymous SNV      | 1145 | 3      | 0.0026 |
| 53 | D | 20 | 33872184  | 33872184  | 20:33872184-33872184  | C | G | E1F6    | p.G107C       | p.R36T            | nonsynonymous SNV      | 1017 | 3      | 0.0029 |
| 53 | A | 20 | 33872197  | 33872197  | 20:33872197-33872197  | C | A | E1F6    | c.G94T        | p.E32X            | stopgain               | 1133 | 22     | 0.019  |
| 53 | B | 20 | 33872197  | 33872197  | 20:33872197-33872197  | C | A | E1F6    | c.G94T        | p.E32X            | stopgain               | 747  | 15     | 0.0197 |
| 53 | C | 20 | 33872197  | 33872197  | 20:33872197-33872197  | C | A | E1F6    | c.G94T        | p.E32X            | stopgain               | 961  | 12     | 0.0123 |
| 53 | D | 20 | 33872197  | 33872197  | 20:33872197-33872197  | C | A | E1F6    | c.G94T        | p.E32X            | stopgain               | 1036 | 7      | 0.0067 |
| 53 | E | 20 | 33872197  | 33872197  | 20:33872197-33872197  | C | A | E1F6    | c.G94T        | p.E32X            | stopgain               | 1254 | 4      | 0.0032 |
| 53 | E | 17 | 7579389   | 7579389   | 17:7579389-7579389    | G | A | TP53    | c.C298T       | p.Q100X           | stopgain               | 1307 | 3      | 0.0023 |
| 56 | B | 20 | 33872211  | 33872211  | 20:33872211-33872211  | G | A | E1F6    | c.C80T        | p.A27V            | nonsynonymous SNV      | 1043 | 7      | 0.0067 |
| 57 | G | 20 | 33868509  | 33868509  | 20:33868509-33868509  | T | C | E1F6    | c.A317G       | p.N106S           | nonsynonymous SNV      | 1082 | 4      | 0.0037 |
| 57 | C | 17 | 7577539   | 7577539   | 17:7577539-7577539    | G | A | TP53    | c.C742T       | p.R248W           | nonsynonymous SNV      | 1010 | 3      | 0.003  |
| 57 | D | 17 | 7577539   | 7577539   | 17:7577539-7577539    | G | A | TP53    | c.C742T       | p.R248W           | nonsynonymous SNV      | 1159 | 7      | 0.006  |
| 57 | E | 17 | 7577539   | 7577539   | 17:7577539-7577539    | G | A | TP53    | c.C742T       | p.R248W           | nonsynonymous SNV      | 886  | 5      | 0.0056 |
| 57 | G | 17 | 7577539   | 7577539   | 17:7577539-7577539    | G | A | TP53    | c.C742T       | p.R248W           | nonsynonymous SNV      | 914  | 5      | 0.0054 |
| 57 | H | 17 | 7577539   | 7577539   | 17:7577539-7577539    | G | A | TP53    | c.C742T       | p.R248W           | nonsynonymous SNV      | 1001 | 6      | 0.006  |
| 57 | B | 17 | 7578507   | 7578507   | 17:7578507-7578507    | O | - | TP53    | c.418_423del  | p.140_141del      | nonframeshift deletion | 901  | 3      | 0.0033 |
| 58 | D | 20 | 33867495  | 33867500  | 20:33867495-33867500  | O | - | E1F6    | c.540_545del  | p.180_182del      | nonframeshift deletion | 831  | 5      | 0.006  |
| 58 | D | 20 | 33871990  | 33871990  | 20:33871990-33871990  | C | T | E1F6    | c.G301A       | p.A101T           | nonsynonymous SNV      | 649  | 5      | 0.0076 |
| 58 | C | 17 | 7577082   | 7577082   | 17:7577082-7577082    | C | T | TP53    | c.G856A       | p.E286K           | nonsynonymous SNV      | 1047 | 4      | 0.0038 |
| 58 | D | 17 | 7577082   | 7577082   | 17:7577082-7577082    | C | T | TP53    | c.G856A       | p.E286K           | nonsynonymous SNV      | 874  | 4      | 0.0046 |
| 62 | A | 20 | 33867790  | 33867790  | 20:33867790-33867790  | - | G | E1F6    | c.443_444insC | p.I148fs          | frameshift insertion   | 976  | 3      | 0.0031 |
| 62 | A | 20 | 33867791  | 33867791  | 20:33867791-33867791  | A | T | E1F6    | c.T443A       | p.I148N           | nonsynonymous SNV      | 987  | 3      | 0.003  |
| 62 | C | 20 | 33868509  | 33868509  | 20:33868509-33868509  | T | C | E1F6    | c.A317G       | p.N106S           | nonsynonymous SNV      | 922  | 3      | 0.0032 |
| 62 | C | 20 | 33868611  | 33868611  | 20:33868611-33868611  | A | C | E1F6    | c.T215G       | p.V72G            | nonsynonymous SNV      | 706  | 3      | 0.0042 |
| 63 | D | 20 | 31022441  | 31022441  | 20:31022441-31022441  | - | G | ASXL1   | c.1927dupG    | p.G642fs          | frameshift insertion   | 525  | 6      | 0.0113 |
| 63 | E | 20 | 31022441  | 31022441  | 20:31022441-31022441  | - | G | ASXL1   | c.1927dupG    | p.G642fs          | frameshift insertion   | 571  | 7      | 0.0121 |
| 63 | A | 20 | 33868494  | 33868494  | 20:33868494-33868494  | T | C | E1F6    | c.A332G       | p.N111S           | nonsynonymous SNV      | 794  | 3      | 0.0038 |
| 63 | D | 17 | 7577120   | 7577120   | 17:7577120-7577120    | C | T | TP53    | c.G818A       | p.R273H           | nonsynonymous SNV      | 1013 | 3      | 0.003  |
| 64 | A | 20 | 33867001  | 33867005  | 20:33867001-33867005  | O | - | E1F6    | c.676_680del  | p.T226fs          | frameshift deletion    | 902  | 24     | 0.0259 |
| 64 | B | 20 | 33867001  | 33867005  | 20:33867001-33867005  | O | - | E1F6    | c.676_680del  | p.T226fs          | frameshift deletion    | 679  | 19     | 0.0272 |
| 64 | A | 20 | 33867866  | 33867869  | 20:33867866-33867869  | O | - | E1F6    | c.365_368del  | p.T122fs          | frameshift deletion    | 947  | 12     | 0.0125 |
| 64 | B | 20 | 33867866  | 33867869  | 20:33867866-33867869  | O | - | E1F6    | c.365_368del  | p.T122fs          | frameshift deletion    | 680  | 10     | 0.0145 |
| 64 | A | 20 | 33867912  | 33867912  | 20:33867912-33867912  | C | T | E1F6    | c.G322A       | p.E108K           | nonsynonymous SNV      | 491  | 193    | 0.2822 |
| 64 | B | 20 | 33867912  | 33867912  | 20:33867912-33867912  | C | T | E1F6    | c.G322A       | p.E108K           | nonsynonymous SNV      | 365  | 100    | 0.2151 |
| 64 | A | 20 | 33868509  | 33868509  | 20:33868509-33868509  | T | C | E1F6    | c.A317G       | p.N106S           | nonsynonymous SNV      | 957  | 7      | 0.0073 |
| 64 | B | 20 | 33868509  | 33868509  | 20:33868509-33868509  | T | C | E1F6    | c.A317G       | p.N106S           | nonsynonymous SNV      | 747  | 5      | 0.0066 |
| 65 | A | 20 | 33867888  | 33867888  | 20:33867888-33867888  | C | T | E1F6    | c.G346A       | p.V116M           | nonsynonymous SNV      | 1101 | 3      | 0.0027 |
| 65 | A | 20 | 33867923  | 33867923  | 20:33867923-33867923  | T | C | E1F6    | c.313-2A>G    |                   | splicing               | 824  | 3      | 0.0036 |
| 65 | A | 17 | 7577539   | 7577539   | 17:7577539-7577539    | G | A | TP53    | c.C742T       | p.R248W           | nonsynonymous SNV      | 950  | 32     | 0.0326 |
| 67 | D | 20 | 33867773  | 33867773  | 20:33867773-33867773  | A | C | E1F6    | c.T461G       | p.L154R           | nonsynonymous SNV      | 967  | 4      | 0.0041 |
| 67 | C | 20 | 33868540  | 33868540  | 20:33868540-33868540  | G | A | E1F6    | c.C286T       | p.R96W            | nonsynonymous SNV      | 1231 | 4      | 0.0032 |
| 67 | D | 20 | 33868540  | 33868540  | 20:33868540-33868540  | G | A | E1F6    | c.C286T       | p.R96W            | nonsynonymous SNV      | 1134 | 7      | 0.0061 |
| 67 | E | 20 | 33868540  | 33868540  | 20:33868540-33868540  | G | A | E1F6    | c.C286T       | p.R96W            | nonsynonymous SNV      | 1359 | 6      | 0.0044 |
| 67 | G | 20 | 33868540  | 33868540  | 20:33868540-33868540  | G | A | E1F6    | c.C286T       | p.R96W            | nonsynonymous SNV      | 968  | 3      | 0.0031 |
| 68 | A | 20 | 33868467  | 33868467  | 20:33868467-33868467  | T | A | E1F6    | c.A359T       | p.D120V           | nonsynonymous SNV      | 1103 | 18     | 0.0161 |
| 68 | A | 20 | 33868488  | 33868488  | 20:33868488-33868488  | T | C | E1F6    | c.A338G       | p.Y113C           | nonsynonymous SNV      | 1254 | 4      | 0.0032 |
| 68 | B | 20 | 33868488  | 33868488  | 20:33868488-33868488  | T | C | E1F6    | c.A338G       | p.Y113C           | nonsynonymous SNV      | 758  | 5      | 0.0066 |
| 68 | A | 20 | 33868509  | 33868509  | 20:33868509-33868509  | T | C | E1F6    | c.A317G       | p.N106S           | nonsynonymous SNV      | 1292 | 5      | 0.0039 |
| 68 | B | 20 | 33868509  | 33868509  | 20:33868509-33868509  | T | C | E1F6    | c.A317G       | p.N106S           | nonsynonymous SNV      | 805  | 3      | 0.0037 |
| 68 | B | 20 | 33868540  | 33868540  | 20:33868540-33868540  | G | A | E1F6    | c.C286T       | p.R96W            | nonsynonymous SNV      | 835  | 3      | 0.0036 |
| 68 | A | 20 | 33872222  | 33872222  | 20:33872222-33872222  | - | T | E1F6    | c.68dupA      | p.Y23_C24delinsX  | stopgain               | 1213 | 26     | 0.021  |
| 68 | B | 20 | 33872222  | 33872222  | 20:33872222-33872222  | - | T | E1F6    | c.68dupA      | p.Y23_C24delinsX  | stopgain               | 744  | 14     | 0.0185 |
| 68 | B | 17 | 7577555   | 7577555   | 17:7577555-7577555    | G | C | TP53    | c.C726G       | p.C242V           | nonsynonymous SNV      | 805  | 3      | 0.0037 |
| 68 | A | 17 | 7577568   | 7577568   | 17:7577568-7577568    | C | A | TP53    | c.G713T       | p.C238F           | nonsynonymous SNV      | 1062 | 4      | 0.0038 |
| 68 | A | 17 | 7578271   | 7578271   | 17:7578271-7578271    | C | C | TP53    | c.A578G       | p.H193R           | nonsynonymous SNV      | 1193 | 6      | 0.005  |
| 68 | B | 17 | 7578271   | 7578271   | 17:7578271-7578271    | C | C | TP53    | c.A578G       | p.H193R           | nonsynonymous SNV      | 743  | 3      | 0.004  |
| 68 | B | 17 | 7578413   | 7578413   | 17:7578413-7578413    | T | C | TP53    | c.G517A       | p.V173M           | nonsynonymous SNV      | 801  | 3      | 0.0037 |
| 69 | A | 5  | 148904673 | 148904673 | 5:148904673-148904673 | C | T | CSNK1A1 | c.G292A       | p.E98K            | nonsynonymous SNV      | 1231 | 5      | 0.004  |
| 69 | A | 20 | 33867749  | 33867749  | 20:33867749-33867749  | A | T | E1F6    | c.T485A       | p.L162H           | nonsynonymous SNV      | 992  | 3      | 0.003  |
| 69 | A | 20 | 33868540  | 33868540  | 20:33868540-33868540  | G | A | E1F6    | c.C286T       | p.R96W            | nonsynonymous SNV      | 1418 | 27     | 0.0187 |
| 69 | A | 20 | 33868582  | 33868582  | 20:33868582-33868582  | G | A | E1F6    | c.C244T       | p.Q82X            | stopgain               | 1415 | 3      | 0.0021 |
| 69 | A | 20 | 33872058  | 33872058  | 20:33872058-33872058  | G | - | E1F6    | c.114delC     | p.F38fs           | frameshift deletion    | 1094 | 5      | 0.0045 |
| 69 | A |    |           |           |                       |   |   |         |               |                   |                        |      |        |        |

|    |   |    |           |           |                       |   |   |         |              |                  |                      |      |     |        |
|----|---|----|-----------|-----------|-----------------------|---|---|---------|--------------|------------------|----------------------|------|-----|--------|
| 72 | A | 20 | 33872289  | 33872289  | 20:33872289-33872289  | A | G | E1F6    | C.T2C        | p.M1T            | nonsynonymous SNV    | 605  | 124 | 0.1701 |
| 72 | B | 20 | 33872289  | 33872289  | 20:33872289-33872289  | A | G | E1F6    | C.T2C        | p.M1T            | nonsynonymous SNV    | 665  | 79  | 0.1062 |
| 72 | C | 20 | 33872289  | 33872289  | 20:33872289-33872289  | A | G | E1F6    | C.T2C        | p.M1T            | nonsynonymous SNV    | 727  | 61  | 0.0774 |
| 72 | D | 20 | 33872289  | 33872289  | 20:33872289-33872289  | A | G | E1F6    | C.T2C        | p.M1T            | nonsynonymous SNV    | 558  | 42  | 0.07   |
| 72 | A | 4  | 106155778 | 106155778 | 4:106155778-106155778 | G | T | TE2T    | C.G679T      | p.E227X          | stopgain             | 969  | 30  | 0.03   |
| 72 | B | 4  | 106155778 | 106155778 | 4:106155778-106155778 | G | T | TE2T    | C.G679T      | p.E227X          | stopgain             | 1153 | 15  | 0.0128 |
| 72 | C | 4  | 106155778 | 106155778 | 4:106155778-106155778 | G | T | TE2T    | C.G679T      | p.E227X          | stopgain             | 946  | 17  | 0.0177 |
| 72 | D | 4  | 106155778 | 106155778 | 4:106155778-106155778 | G | T | TE2T    | C.G679T      | p.E227X          | stopgain             | 890  | 5   | 0.0056 |
| 73 | C | 20 | 33867922  | 33867922  | 20:33867922-33867922  | C | G | E1F6    | C.313-1G-C   |                  | splicing             | 1004 | 9   | 0.0089 |
| 73 | C | 20 | 33868509  | 33868509  | 20:33868509-33868509  | T | C | E1F6    | C.A317G      | p.N106S          | nonsynonymous SNV    | 1651 | 3   | 0.0018 |
| 73 | C | 20 | 33868594  | 33868594  | 20:33868594-33868594  | C | A | E1F6    | C.G232T      | p.D78Y           | nonsynonymous SNV    | 1535 | 3   | 0.002  |
| 73 | D | 20 | 33872065  | 33872065  | 20:33872065-33872065  | C | A | E1F6    | C.G226T      | p.V76L           | nonsynonymous SNV    | 931  | 5   | 0.0053 |
| 73 | C | 20 | 33872257  | 33872257  | 20:33872257-33872257  | - | A | E1F6    | C.33dupT     | p.E12_113delinsX | stopgain             | 1387 | 5   | 0.0036 |
| 74 | D | 20 | 33868519  | 33868519  | 20:33868519-33868519  | C | G | E1F6    | C.G307C      | p.A103P          | nonsynonymous SNV    | 1241 | 14  | 0.0112 |
| 75 | A | 20 | 33867453  | 33867453  | 20:33867453-33867453  | A | G | E1F6    | C.T587C      | p.L196P          | nonsynonymous SNV    | 1369 | 38  | 0.027  |
| 75 | C | 20 | 33867761  | 33867761  | 20:33867761-33867761  | A | C | E1F6    | C.T473G      | p.L158R          | nonsynonymous SNV    | 1240 | 5   | 0.004  |
| 75 | A | 20 | 33868495  | 33868495  | 20:33868495-33868495  | T | C | E1F6    | C.A311G      | p.N111D          | nonsynonymous SNV    | 1355 | 11  | 0.0081 |
| 75 | A | 20 | 33868509  | 33868509  | 20:33868509-33868509  | T | C | E1F6    | C.A317G      | p.N106S          | nonsynonymous SNV    | 1342 | 19  | 0.014  |
| 75 | B | 20 | 33868509  | 33868509  | 20:33868509-33868509  | T | C | E1F6    | C.A317G      | p.N106S          | nonsynonymous SNV    | 929  | 3   | 0.0032 |
| 75 | C | 20 | 33868509  | 33868509  | 20:33868509-33868509  | T | C | E1F6    | C.A317G      | p.N106S          | nonsynonymous SNV    | 1561 | 13  | 0.0083 |
| 75 | 1 | 20 | 33868509  | 33868509  | 20:33868509-33868509  | T | C | E1F6    | C.A317G      | p.N106S          | nonsynonymous SNV    | 1392 | 4   | 0.0029 |
| 75 | A | 20 | 33868551  | 33868551  | 20:33868551-33868551  | A | T | E1F6    | C.T275A      | p.V92E           | nonsynonymous SNV    | 1279 | 3   | 0.0023 |
| 75 | B | 20 | 33868575  | 33868575  | 20:33868575-33868575  | - | T | E1F6    | C.250dupA    | p.I84fs          | frameshift insertion | 917  | 7   | 0.0076 |
| 75 | A | 20 | 33868608  | 33868608  | 20:33868608-33868608  | C | G | E1F6    | C.C218G      | p.P73R           | nonsynonymous SNV    | 1134 | 17  | 0.0148 |
| 75 | A | 20 | 33868632  | 33868632  | 20:33868632-33868632  | C | A | E1F6    | C.G194T      | p.G65V           | nonsynonymous SNV    | 893  | 5   | 0.0056 |
| 75 | A | 17 | 1565303   | 1565303   | 17:1565303-1565303    | T | C | PRPF8   | C.A3919G     | p.M1307V         | nonsynonymous SNV    | 1095 | 128 | 0.1047 |
| 75 | B | 17 | 1565303   | 1565303   | 17:1565303-1565303    | T | C | PRPF8   | C.A3919G     | p.M1307V         | nonsynonymous SNV    | 581  | 223 | 0.2774 |
| 75 | C | 17 | 1565303   | 1565303   | 17:1565303-1565303    | T | C | PRPF8   | C.A3919G     | p.M1307V         | nonsynonymous SNV    | 951  | 459 | 0.3255 |
| 75 | 1 | 17 | 1565303   | 1565303   | 17:1565303-1565303    | T | C | PRPF8   | C.A3919G     | p.M1307V         | nonsynonymous SNV    | 780  | 471 | 0.3765 |
| 75 | B | 17 | 7577557   | 7577557   | 17:7577557-7577557    | A | T | TP53    | C.T724A      | p.C242S          | nonsynonymous SNV    | 848  | 3   | 0.0035 |
| 75 | A | 17 | 7578235   | 7578235   | 17:7578235-7578235    | T | C | TP53    | C.A614G      | p.Y205C          | nonsynonymous SNV    | 1201 | 9   | 0.0074 |
| 76 | D | 20 | 33867477  | 33867477  | 20:33867477-33867477  | C | T | E1F6    | C.G563A      | p.G188D          | nonsynonymous SNV    | 1335 | 3   | 0.0022 |
| 76 | E | 20 | 33868519  | 33868519  | 20:33868519-33868519  | C | G | E1F6    | C.G307C      | p.A103P          | nonsynonymous SNV    | 1302 | 7   | 0.0053 |
| 76 | G | 20 | 33868519  | 33868519  | 20:33868519-33868519  | C | G | E1F6    | C.G307C      | p.A103P          | nonsynonymous SNV    | 855  | 7   | 0.0081 |
| 76 | H | 20 | 33868519  | 33868519  | 20:33868519-33868519  | C | G | E1F6    | C.G307C      | p.A103P          | nonsynonymous SNV    | 980  | 132 | 0.1187 |
| 78 | A | 20 | 33867534  | 33867534  | 20:33867534-33867534  | C | G | E1F6    | C.G506C      | p.R169P          | nonsynonymous SNV    | 853  | 38  | 0.0426 |
| 78 | B | 20 | 33867534  | 33867534  | 20:33867534-33867534  | C | G | E1F6    | C.G506C      | p.R169P          | nonsynonymous SNV    | 989  | 12  | 0.012  |
| 78 | C | 20 | 33867534  | 33867534  | 20:33867534-33867534  | C | G | E1F6    | C.G506C      | p.R169P          | nonsynonymous SNV    | 1019 | 23  | 0.0221 |
| 78 | D | 20 | 33867534  | 33867534  | 20:33867534-33867534  | C | G | E1F6    | C.G506C      | p.R169P          | nonsynonymous SNV    | 995  | 18  | 0.0178 |
| 78 | E | 20 | 33867534  | 33867534  | 20:33867534-33867534  | C | G | E1F6    | C.G506C      | p.R169P          | nonsynonymous SNV    | 930  | 22  | 0.0231 |
| 78 | G | 20 | 33867534  | 33867534  | 20:33867534-33867534  | C | G | E1F6    | C.G506C      | p.R169P          | nonsynonymous SNV    | 777  | 22  | 0.0275 |
| 78 | H | 20 | 33867534  | 33867534  | 20:33867534-33867534  | C | G | E1F6    | C.G506C      | p.R169P          | nonsynonymous SNV    | 871  | 23  | 0.0257 |
| 78 | B | 20 | 33868608  | 33868608  | 20:33868608-33868608  | G | A | E1F6    | C.C218T      | p.P73L           | nonsynonymous SNV    | 1042 | 6   | 0.0057 |
| 78 | E | 20 | 33868608  | 33868608  | 20:33868608-33868608  | G | A | E1F6    | C.C218T      | p.P73L           | nonsynonymous SNV    | 981  | 5   | 0.0051 |
| 78 | G | 20 | 33868608  | 33868608  | 20:33868608-33868608  | G | A | E1F6    | C.C218T      | p.P73L           | nonsynonymous SNV    | 810  | 5   | 0.0061 |
| 78 | H | 20 | 33868608  | 33868608  | 20:33868608-33868608  | G | A | E1F6    | C.C218T      | p.P73L           | nonsynonymous SNV    | 891  | 4   | 0.0045 |
| 78 | B | 17 | 7577094   | 7577094   | 17:7577094-7577094    | G | C | TP53    | C.R844G      | p.R282G          | nonsynonymous SNV    | 1392 | 3   | 0.0022 |
| 78 | C | 17 | 7577094   | 7577094   | 17:7577094-7577094    | G | C | TP53    | C.R844G      | p.R282G          | nonsynonymous SNV    | 1343 | 3   | 0.0022 |
| 78 | D | 17 | 7577094   | 7577094   | 17:7577094-7577094    | G | C | TP53    | C.R844G      | p.R282G          | nonsynonymous SNV    | 1263 | 3   | 0.0024 |
| 78 | G | 17 | 7577094   | 7577094   | 17:7577094-7577094    | G | C | TP53    | C.R844G      | p.R282G          | nonsynonymous SNV    | 983  | 9   | 0.0091 |
| 78 | H | 17 | 7577095   | 7577095   | 17:7577095-7577095    | G | T | TP53    | C.C843A      | p.D281E          | nonsynonymous SNV    | 1082 | 3   | 0.0028 |
| 78 | G | 17 | 7577120   | 7577120   | 17:7577120-7577120    | C | T | TP53    | C.G818A      | p.R273H          | nonsynonymous SNV    | 946  | 3   | 0.0032 |
| 78 | H | 17 | 7577120   | 7577120   | 17:7577120-7577120    | C | T | TP53    | C.G818A      | p.R273H          | nonsynonymous SNV    | 1067 | 4   | 0.0037 |
| 78 | A | 17 | 7577538   | 7577538   | 17:7577538-7577538    | C | T | TP53    | C.G743A      | p.R248Q          | nonsynonymous SNV    | 983  | 29  | 0.0287 |
| 78 | B | 17 | 7577538   | 7577538   | 17:7577538-7577538    | C | T | TP53    | C.G743A      | p.R248Q          | nonsynonymous SNV    | 1150 | 18  | 0.0154 |
| 78 | C | 17 | 7577538   | 7577538   | 17:7577538-7577538    | C | T | TP53    | C.G743A      | p.R248Q          | nonsynonymous SNV    | 1124 | 26  | 0.0226 |
| 78 | D | 17 | 7577538   | 7577538   | 17:7577538-7577538    | C | T | TP53    | C.G743A      | p.R248Q          | nonsynonymous SNV    | 1068 | 33  | 0.03   |
| 78 | E | 17 | 7577538   | 7577538   | 17:7577538-7577538    | C | T | TP53    | C.G743A      | p.R248Q          | nonsynonymous SNV    | 1153 | 23  | 0.0196 |
| 78 | G | 17 | 7577538   | 7577538   | 17:7577538-7577538    | C | T | TP53    | C.G743A      | p.R248Q          | nonsynonymous SNV    | 887  | 13  | 0.0144 |
| 78 | H | 17 | 7577538   | 7577538   | 17:7577538-7577538    | C | T | TP53    | C.G743A      | p.R248Q          | nonsynonymous SNV    | 1013 | 17  | 0.0165 |
| 78 | G | 17 | 7578406   | 7578406   | 17:7578406-7578406    | C | T | TP53    | C.G524A      | p.R175H          | nonsynonymous SNV    | 1085 | 3   | 0.0028 |
| 79 | A | 20 | 33868540  | 33868540  | 20:33868540-33868540  | G | A | E1F6    | C.C286T      | p.R96W           | nonsynonymous SNV    | 1197 | 5   | 0.0042 |
| 80 | A | 20 | 33868540  | 33868540  | 20:33868540-33868540  | G | A | E1F6    | C.C286T      | p.R96W           | nonsynonymous SNV    | 1070 | 6   | 0.0056 |
| 80 | A | 20 | 33868582  | 33868582  | 20:33868582-33868582  | G | A | E1F6    | C.C244T      | p.Q82X           | stopgain             | 1115 | 7   | 0.0062 |
| 80 | A | 20 | 33872032  | 33872032  | 20:33872032-33872032  | G | A | E1F6    | C.C259T      | p.P87S           | nonsynonymous SNV    | 797  | 127 | 0.1374 |
| 80 | A | 21 | 36259172  | 36259172  | 21:36259172-36259172  | G | C | RUNX1   | C.C319G      | p.R107G          | nonsynonymous SNV    | 1083 | 10  | 0.0091 |
| 80 | A | 17 | 7577538   | 7577538   | 17:7577538-7577538    | C | T | TP53    | C.G743A      | p.R248Q          | nonsynonymous SNV    | 1059 | 3   | 0.0028 |
| 82 | A | 20 | 33868494  | 33868494  | 20:33868494-33868494  | T | C | E1F6    | C.A332G      | p.N111S          | nonsynonymous SNV    | 1089 | 16  | 0.0145 |
| 82 | A | 20 | 33868540  | 33868540  | 20:33868540-33868540  | G | A | E1F6    | C.C286T      | p.R96W           | nonsynonymous SNV    | 1111 | 3   | 0.0027 |
| 82 | A | 17 | 1563731   | 1563731   | 17:1563731-1563731    | A | G | PRPF8   | C.T4780C     | p.C1594R         | nonsynonymous SNV    | 754  | 3   | 0.004  |
| 82 | A | 17 | 7577094   | 7577094   | 17:7577094-7577094    | G | A | TP53    | C.C844T      | p.R282W          | nonsynonymous SNV    | 1088 | 8   | 0.0073 |
| 86 | B | 5  | 148904672 | 148904672 | 5:148904672-148904672 | T | C | CSNK1A1 | C.A293G      | p.E98K           | nonsynonymous SNV    | 775  | 5   | 0.0064 |
| 86 | B | 5  | 148904673 | 148904673 | 5:148904673-148904673 | C | T | CSNK1A1 | C.G292A      | p.E98K           | nonsynonymous SNV    | 703  | 78  | 0.0999 |
| 86 | A | 20 | 33867749  | 33867749  | 20:33867749-33867749  | A | G | E1F6    | C.T485C      | p.L162P          | nonsynonymous SNV    | 709  | 44  | 0.0584 |
| 86 | B | 20 | 33867749  | 33867749  | 20:33867749-33867749  | A | G | E1F6    | C.T485C      | p.L162P          | nonsynonymous SNV    | 637  | 54  | 0.0781 |
| 86 | B | 20 | 33867858  | 33867858  | 20:33867858-33867858  | G | A | E1F6    | C.C376T      | p.Q126X          | stopgain             | 877  | 3   | 0.0034 |
| 86 | B | 20 | 33872187  | 33872188  | 20:33872187-33872188  | 0 | - | E1F6    | C.103_104del | p.Y35fs          | frameshift deletion  | 858  | 7   | 0.0081 |
| 86 | A | 20 | 33872217  | 33872217  | 20:33872217-33872217  | A | C | E1F6    | C.T74G       | p.L25R           | nonsynonymous SNV    | 987  | 3   | 0.003  |
| 86 | B | 20 | 33872250  | 33872250  | 20:33872250-33872250  | T | C | E1F6    | C.G41A       | p.G14D           | nonsynonymous SNV    | 908  | 4   | 0.0044 |
| 86 | A | 17 | 1565295   | 1565295   | 17:1565295-1565295    | A | T | PRPF8   | C.T3927A     | p.S1309R         | nonsynonymous SNV    | 921  | 8   | 0.0086 |
| 86 | B | 17 | 1565295   | 1565295   | 17:1565295-1565295    | A | T | PRPF8   | C.T3927A     | p.S1309R         | nonsynonymous SNV    | 834  | 3   | 0.0036 |
| 86 | A | 17 | 7577532   | 7577532   | 17:7577532-7577532    | G | A | TP53    | C.C749T      | p.P250L          | nonsynonymous SNV    | 883  | 3   | 0.0034 |
| 86 | B | 17 | 7577556   | 7577556   | 17:7577556-7577556    | C | G | TP53    | C.G725C      | p.C242S          | nonsynonymous SNV    | 826  | 5   | 0.006  |
| 86 | A | 17 | 7578406   | 7578406   | 17:7578406-7578406    | C | T | TP53    | C.G524A      | p.R175H          | nonsynonymous SNV    | 1035 | 3   |        |

|    |   |    |           |           |                       |   |       |        |                  |                  |                         |      |     |        |
|----|---|----|-----------|-----------|-----------------------|---|-------|--------|------------------|------------------|-------------------------|------|-----|--------|
| 89 | B | 20 | 33872224  | 33872224  | 20:33872224-33872224  | A | G     | E1F6   | c.T67C           | p.Y23H           | nonsynonymous SNV       | 893  | 7   | 0.0078 |
| 89 | C | 20 | 33872224  | 33872224  | 20:33872224-33872224  | A | G     | E1F6   | c.T67C           | p.Y23H           | nonsynonymous SNV       | 1391 | 6   | 0.0043 |
| 89 | E | 12 | 25380279  | 25380279  | 12:25380279-25380279  | C | A     | KRAS   | c.G179T          | p.G60V           | nonsynonymous SNV       | 985  | 8   | 0.0081 |
| 89 | G | 12 | 25380279  | 25380279  | 12:25380279-25380279  | C | A     | KRAS   | c.G179T          | p.G60V           | nonsynonymous SNV       | 1625 | 22  | 0.0134 |
| 89 | E | 1  | 115258747 | 115258747 | 1:115258747-115258747 | C | T     | NRAS   | c.G35A           | p.G12D           | nonsynonymous SNV       | 839  | 144 | 0.1465 |
| 89 | G | 1  | 115258747 | 115258747 | 1:115258747-115258747 | C | T     | NRAS   | c.G35A           | p.G12D           | nonsynonymous SNV       | 1068 | 267 | 0.2    |
| 89 | G | 7  | 66460343  | 66460343  | 7:66460343-66460343   | T | C     | SRD5   | c.A62G           | p.K21R           | nonsynonymous SNV       | 1453 | 3   | 0.0021 |
| 89 | D | 18 | 42531924  | 42531926  | 18:42531924-42531926  | 0 | -     | SETBP1 | c.2619_2621del   | p.873_874del     | nonframeshift deletion  | 519  | 50  | 0.0879 |
| 89 | E | 18 | 42531924  | 42531926  | 18:42531924-42531926  | 0 | -     | SETBP1 | c.2619_2621del   | p.873_874del     | nonframeshift deletion  | 698  | 292 | 0.2949 |
| 89 | G | 18 | 42531924  | 42531926  | 18:42531924-42531926  | 0 | -     | SETBP1 | c.2619_2621del   | p.873_874del     | nonframeshift deletion  | 1046 | 268 | 0.204  |
| 89 | B | 17 | 7578406   | 7578406   | 17:7578406-7578406    | C | T     | TP53   | c.G524A          | p.R175H          | nonsynonymous SNV       | 794  | 5   | 0.0063 |
| 89 | C | 17 | 7578406   | 7578406   | 17:7578406-7578406    | C | T     | TP53   | c.G524A          | p.R175H          | nonsynonymous SNV       | 1285 | 3   | 0.0023 |
| 90 | B | 20 | 33867858  | 33867858  | 20:33867858-33867858  | G | A     | E1F6   | c.C376T          | p.Q126X          | stopgain                | 973  | 5   | 0.0051 |
| 92 | A | 20 | 33867511  | 33867511  | 20:33867511-33867511  | C | T     | E1F6   | c.G529A          | p.G177R          | nonsynonymous SNV       | 1703 | 14  | 0.0082 |
| 92 | I | 20 | 33867511  | 33867511  | 20:33867511-33867511  | C | T     | E1F6   | c.G529A          | p.G177R          | nonsynonymous SNV       | 1544 | 4   | 0.0026 |
| 92 | A | 20 | 33867534  | 33867534  | 20:33867534-33867534  | C | G     | E1F6   | c.G506C          | p.R169P          | nonsynonymous SNV       | 1481 | 3   | 0.002  |
| 92 | A | 20 | 33867742  | 33867744  | 20:33867742-33867744  | 0 | -     | E1F6   |                  |                  | splicing                | 1207 | 10  | 0.0082 |
| 92 | I | 20 | 33867742  | 33867744  | 20:33867742-33867744  | 0 | -     | E1F6   |                  |                  | splicing                | 1029 | 23  | 0.0219 |
| 92 | A | 20 | 33868540  | 33868540  | 20:33868540-33868540  | G | A     | E1F6   | c.C286T          | p.R96V           | nonsynonymous SNV       | 1635 | 3   | 0.0018 |
| 92 | I | 20 | 33871979  | 33871979  | 20:33871979-33871979  | - | CACA  | E1F6   | c.311_312insTGTG | p.W104fs         | frameshift insertion    | 1107 | 21  | 0.0186 |
| 92 | A | 7  | 148504764 | 148504764 | 7:148504764-148504764 | - | CGGGG | E2H2   | c.2229_2230insCC | p.I744fs         | frameshift insertion    | 1103 | 14  | 0.0125 |
| 92 | I | 7  | 148504764 | 148504764 | 7:148504764-148504764 | - | CGGGG | E2H2   | c.2229_2230insCC | p.I744fs         | frameshift insertion    | 1014 | 14  | 0.0136 |
| 92 | A | 17 | 1565303   | 1565303   | 17:1565303-1565303    | T | C     | PRPF8  | c.A3919G         | p.M1307V         | nonsynonymous SNV       | 1608 | 5   | 0.0031 |
| 92 | A | 21 | 36231791  | 36231791  | 21:36231791-36231791  | T | C     | RUNX1  | c.A593G          | p.D198G          | nonsynonymous SNV       | 1328 | 68  | 0.0487 |
| 92 | I | 21 | 36231791  | 36231791  | 21:36231791-36231791  | T | C     | RUNX1  | c.A593G          | p.D198G          | nonsynonymous SNV       | 1127 | 92  | 0.0755 |
| 92 | I | 17 | 7577524   | 7577524   | 17:7577524-7577524    | T | G     | TP53   | c.A757C          | p.T253P          | nonsynonymous SNV       | 1236 | 38  | 0.0298 |
| 92 | A | 17 | 7577539   | 7577539   | 17:7577539-7577539    | G | A     | TP53   | c.C742T          | p.R248W          | nonsynonymous SNV       | 1491 | 4   | 0.0027 |
| 92 | A | 17 | 7578271   | 7578271   | 17:7578271-7578271    | T | C     | TP53   | c.A578G          | p.H193R          | nonsynonymous SNV       | 1565 | 3   | 0.0019 |
| 92 | I | 17 | 7578271   | 7578271   | 17:7578271-7578271    | T | C     | TP53   | c.A578G          | p.H193R          | nonsynonymous SNV       | 1343 | 4   | 0.003  |
| 93 | B | 20 | 33867468  | 33867468  | 20:33867468-33867468  | G | A     | E1F6   | c.C572T          | p.T181I          | nonsynonymous SNV       | 1231 | 3   | 0.0024 |
| 93 | A | 20 | 33867498  | 33867498  | 20:33867498-33867498  | T | A     | E1F6   | c.A542T          | p.N181I          | nonsynonymous SNV       | 1084 | 5   | 0.0046 |
| 93 | B | 20 | 33867498  | 33867498  | 20:33867498-33867498  | T | A     | E1F6   | c.A542T          | p.N181I          | nonsynonymous SNV       | 1180 | 4   | 0.0034 |
| 93 | A | 20 | 33867755  | 33867755  | 20:33867755-33867755  | A | C     | E1F6   | c.T479G          | p.V160G          | nonsynonymous SNV       | 821  | 4   | 0.0048 |
| 93 | A | 20 | 33867812  | 33867812  | 20:33867812-33867812  | A | G     | E1F6   | c.T422C          | p.L141P          | nonsynonymous SNV       | 1108 | 8   | 0.0072 |
| 93 | B | 20 | 33867812  | 33867812  | 20:33867812-33867812  | A | G     | E1F6   | c.T422C          | p.L141P          | nonsynonymous SNV       | 1354 | 3   | 0.0022 |
| 93 | B | 20 | 33867828  | 33867830  | 20:33867828-33867830  | 0 | -     | E1F6   | c.404_406del     | p.135_136del     | nonframeshift deletion  | 1336 | 3   | 0.0022 |
| 93 | A | 20 | 33867922  | 33867922  | 20:33867922-33867922  | C | T     | E1F6   | c.313-1G-A       |                  | splicing                | 650  | 21  | 0.0313 |
| 93 | B | 20 | 33867922  | 33867922  | 20:33867922-33867922  | C | T     | E1F6   | c.313-1G-A       |                  | splicing                | 868  | 17  | 0.0192 |
| 93 | A | 20 | 33872184  | 33872184  | 20:33872184-33872184  | C | A     | E1F6   | c.G107T          | p.R36M           | nonsynonymous SNV       | 1086 | 4   | 0.0037 |
| 93 | B | 20 | 33872184  | 33872184  | 20:33872184-33872184  | C | A     | E1F6   | c.G107T          | p.R36M           | nonsynonymous SNV       | 961  | 4   | 0.0041 |
| 93 | A | 20 | 33872222  | 33872222  | 20:33872222-33872222  | - | T     | E1F6   | c.68dupA         | p.Y23_C24delinsX | stopgain                | 1127 | 3   | 0.0027 |
| 93 | B | 17 | 7574034   | 7574034   | 17:7574034-7574034    | C | G     | TP53   | c.877-1G-C       |                  | splicing                | 1097 | 5   | 0.0045 |
| 93 | B | 17 | 7574035   | 7574035   | 17:7574035-7574035    | T | G     | TP53   | c.877-2A-C       |                  | splicing                | 1087 | 5   | 0.0046 |
| 93 | A | 17 | 7577081   | 7577081   | 17:7577081-7577081    | T | A     | TP53   | c.A857T          | p.E286V          | nonsynonymous SNV       | 1207 | 6   | 0.0049 |
| 93 | B | 17 | 7577081   | 7577081   | 17:7577081-7577081    | T | A     | TP53   | c.A857T          | p.E286V          | nonsynonymous SNV       | 1386 | 5   | 0.0036 |
| 93 | A | 17 | 7577094   | 7577094   | 17:7577094-7577094    | G | A     | TP53   | c.C844T          | p.R282W          | nonsynonymous SNV       | 1194 | 11  | 0.0091 |
| 93 | B | 17 | 7577094   | 7577094   | 17:7577094-7577094    | G | A     | TP53   | c.C844T          | p.R282W          | nonsynonymous SNV       | 1378 | 15  | 0.0108 |
| 93 | A | 17 | 7577095   | 7577095   | 17:7577095-7577095    | G | C     | TP53   | c.C843G          | p.D281E          | nonsynonymous SNV       | 1192 | 4   | 0.0033 |
| 93 | B | 17 | 7577095   | 7577095   | 17:7577095-7577095    | G | C     | TP53   | c.C843G          | p.D281E          | nonsynonymous SNV       | 1393 | 3   | 0.0021 |
| 93 | A | 17 | 7577100   | 7577100   | 17:7577100-7577100    | T | C     | TP53   | c.A838G          | p.R280G          | nonsynonymous SNV       | 1186 | 5   | 0.0042 |
| 93 | B | 17 | 7577100   | 7577100   | 17:7577100-7577100    | T | C     | TP53   | c.A838G          | p.R280G          | nonsynonymous SNV       | 1388 | 9   | 0.0064 |
| 93 | A | 17 | 7577120   | 7577120   | 17:7577120-7577120    | - | GCA   | TP53   | c.817_818insTGC  | p.R273delinsLR   | nonframeshift insertion | 1136 | 3   | 0.0026 |
| 93 | A | 17 | 7577120   | 7577120   | 17:7577120-7577120    | - | GCA   | TP53   | c.817_818insTGC  | p.R273delinsLR   | nonframeshift insertion | 1136 | 31  | 0.0285 |
| 93 | B | 17 | 7577120   | 7577120   | 17:7577120-7577120    | - | GCA   | TP53   | c.817_818insTGC  | p.R273delinsLR   | nonframeshift insertion | 1287 | 48  | 0.0359 |
| 93 | A | 17 | 7577141   | 7577141   | 17:7577141-7577141    | C | T     | TP53   | c.G797A          | p.G266E          | nonsynonymous SNV       | 968  | 3   | 0.0031 |
| 93 | A | 17 | 7577498   | 7577498   | 17:7577498-7577498    | C | T     | TP53   | c.665+1G-A       |                  | splicing                | 846  | 4   | 0.0047 |
| 93 | B | 17 | 7577498   | 7577498   | 17:7577498-7577498    | C | T     | TP53   | c.665+1G-A       |                  | splicing                | 915  | 7   | 0.0076 |
| 93 | A | 17 | 7577511   | 7577511   | 17:7577511-7577511    | A | G     | TP53   | c.T770C          | p.L257P          | nonsynonymous SNV       | 954  | 4   | 0.0042 |
| 93 | B | 17 | 7577511   | 7577511   | 17:7577511-7577511    | A | G     | TP53   | c.T770C          | p.L257P          | nonsynonymous SNV       | 1021 | 5   | 0.0049 |
| 93 | A | 17 | 7577556   | 7577556   | 17:7577556-7577556    | C | G     | TP53   | p.C242S          |                  | nonsynonymous SNV       | 1096 | 5   | 0.0045 |
| 93 | A | 17 | 7577609   | 7577609   | 17:7577609-7577609    | C | A     | TP53   | c.556-1G-T       |                  | splicing                | 749  | 4   | 0.0053 |
| 93 | A | 17 | 7578190   | 7578190   | 17:7578190-7578190    | T | C     | TP53   | c.A659G          | p.Y220C          | nonsynonymous SNV       | 867  | 10  | 0.0114 |
| 93 | B | 17 | 7578190   | 7578190   | 17:7578190-7578190    | T | C     | TP53   | c.A659G          | p.Y220C          | nonsynonymous SNV       | 1020 | 5   | 0.0049 |
| 93 | B | 17 | 7578437   | 7578437   | 17:7578437-7578437    | G | A     | TP53   | c.C493T          | p.Q165X          | stopgain                | 1425 | 3   | 0.0021 |
| 93 | A | 17 | 7578442   | 7578442   | 17:7578442-7578442    | T | C     | TP53   | c.A488G          | p.Y163C          | nonsynonymous SNV       | 1263 | 16  | 0.0125 |
| 93 | B | 17 | 7578442   | 7578442   | 17:7578442-7578442    | T | C     | TP53   | c.A488G          | p.Y163C          | nonsynonymous SNV       | 1401 | 17  | 0.012  |
| 93 | A | 17 | 7578476   | 7578476   | 17:7578476-7578476    | G | T     | TP53   | c.C454A          | p.P152T          | nonsynonymous SNV       | 1176 | 6   | 0.0051 |
| 93 | B | 17 | 7578476   | 7578476   | 17:7578476-7578476    | G | T     | TP53   | c.C454A          | p.P152T          | nonsynonymous SNV       | 1258 | 13  | 0.0102 |
| 93 | A | 17 | 7579345   | 7579347   | 17:7579345-7579347    | 0 | -     | TP53   | c.340_342del     | p.114_114del     | nonframeshift deletion  | 1149 | 4   | 0.0035 |
| 93 | B | 17 | 7579345   | 7579347   | 17:7579345-7579347    | 0 | -     | TP53   | c.340_342del     | p.114_114del     | nonframeshift deletion  | 1374 | 3   | 0.0022 |
| 94 | A | 20 | 33867844  | 33867844  | 20:33867844-33867844  | T | -     | E1F6   | c.390delA        | p.G130fs         | frameshift deletion     | 978  | 10  | 0.0101 |
| 95 | A | 20 | 33867511  | 33867511  | 20:33867511-33867511  | C | T     | E1F6   | c.G529A          | p.G177R          | nonsynonymous SNV       | 880  | 23  | 0.0255 |
| 95 | B | 20 | 33867511  | 33867511  | 20:33867511-33867511  | C | T     | E1F6   | c.G529A          | p.G177R          | nonsynonymous SNV       | 707  | 17  | 0.0235 |
| 95 | A | 20 | 33867758  | 33867760  | 20:33867758-33867760  | 0 | -     | E1F6   | c.474_476del     | p.158_159del     | nonframeshift deletion  | 746  | 3   | 0.004  |
| 95 | B | 20 | 33867758  | 33867760  | 20:33867758-33867760  | 0 | -     | E1F6   | c.474_476del     | p.158_159del     | nonframeshift deletion  | 580  | 4   | 0.0068 |
| 95 | A | 20 | 33867888  | 33867888  | 20:33867888-33867888  | C | T     | E1F6   | c.G346A          | p.V116M          | nonsynonymous SNV       | 775  | 4   | 0.0051 |
| 95 | A | 20 | 33868509  | 33868509  | 20:33868509-33868509  | T | C     | E1F6   | c.A317G          | p.N106S          | nonsynonymous SNV       | 853  | 3   | 0.0035 |
| 95 | B | 20 | 33868509  | 33868509  | 20:33868509-33868509  | T | C     | E1F6   | c.A317G          | p.N106S          | nonsynonymous SNV       | 747  | 7   | 0.0093 |
| 95 | A | 12 | 12037507  | 12037507  | 12:12037507-12037507  | T | A     | ETV6   | c.T1138A         | p.W380R          | nonsynonymous SNV       | 713  | 16  | 0.0219 |
| 95 | B | 17 | 7577120   | 7577120   | 17:7577120-7577120    | C | T     | TP53   | c.G818A          | p.R273H          | nonsynonymous SNV       | 855  | 3   | 0.0035 |
| 95 | B | 17 | 7578402   | 7578402   | 17:7578402-7578402    | G | C     | TP53   | c.C528G          | p.C176W          | nonsynonymous SNV       | 903  | 5   | 0.0055 |
| 95 | A | 17 | 7578406   | 7578406   | 17:7578406-7578406    | C | T     | TP53   | c.G524A          | p.R175H          | nonsynonymous SNV       | 1121 | 6   | 0.0053 |
| 95 | B | 17 | 7578406   | 7578406   | 17:7578406-7578406    | C | T     | TP53   | c.G524A          | p.R175H          | nonsynonymous SNV       | 892  | 17  | 0.0187 |
| 96 | A | 18 | 42531907  | 42531907  | 18:42531907-42531907  | G | A     | SETBP1 | c.G2602A         | p.D868N          | nonsynonymous SNV       |      |     |        |



|     |   |    |           |           |                       |   |   |       |              |              |                        |      |      |        |
|-----|---|----|-----------|-----------|-----------------------|---|---|-------|--------------|--------------|------------------------|------|------|--------|
| 98  | B | 20 | 33868531  | 33868531  | 20:33868531-33868531  | C | G | EIF6  | c.G295C      | p.E99Q       | nonsynonymous SNV      | 1151 | 4    | 0.0035 |
| 98  | A | 20 | 33868546  | 33868550  | 20:33868546-33868550  | O | - | EIF6  | c.276_280del | p.V92fs      | frameshift deletion    | 1003 | 4    | 0.004  |
| 98  | A | 20 | 33868552  | 33868553  | 20:33868552-33868553  | O | - | EIF6  | c.273_274del | p.T91fs      | frameshift deletion    | 1000 | 3    | 0.003  |
| 98  | 1 | 20 | 33868608  | 33868608  | 20:33868608-33868608  | G | C | EIF6  | c.C218G      | p.P73R       | nonsynonymous SNV      | 1416 | 5    | 0.0035 |
| 98  | 3 | 20 | 33868608  | 33868608  | 20:33868608-33868608  | G | C | EIF6  | c.C218G      | p.P73R       | nonsynonymous SNV      | 1663 | 13   | 0.0078 |
| 98  | A | 20 | 33868608  | 33868608  | 20:33868608-33868608  | G | C | EIF6  | c.C218G      | p.P73R       | nonsynonymous SNV      | 863  | 9    | 0.0103 |
| 98  | B | 20 | 33868608  | 33868608  | 20:33868608-33868608  | G | C | EIF6  | c.C218G      | p.P73R       | nonsynonymous SNV      | 1023 | 3    | 0.0029 |
| 98  | C | 20 | 33868608  | 33868608  | 20:33868608-33868608  | G | C | EIF6  | c.C218G      | p.P73R       | nonsynonymous SNV      | 998  | 7    | 0.007  |
| 98  | D | 20 | 33868608  | 33868608  | 20:33868608-33868608  | G | C | EIF6  | c.C218G      | p.P73R       | nonsynonymous SNV      | 902  | 4    | 0.0044 |
| 98  | A | 20 | 33872232  | 33872232  | 20:33872232-33872232  | G | A | EIF6  | c.C59T       | p.T20I       | nonsynonymous SNV      | 933  | 4    | 0.0043 |
| 98  | 1 | 20 | 33872269  | 33872269  | 20:33872269-33872269  | C | A | EIF6  | c.G22T       | p.E8X        | stopgain               | 1370 | 3    | 0.0022 |
| 98  | 3 | 20 | 33872269  | 33872269  | 20:33872269-33872269  | C | A | EIF6  | c.G22T       | p.E8X        | stopgain               | 1662 | 8    | 0.0048 |
| 98  | A | 20 | 33872269  | 33872269  | 20:33872269-33872269  | C | A | EIF6  | c.G22T       | p.E8X        | stopgain               | 867  | 5    | 0.0057 |
| 98  | B | 20 | 33872269  | 33872269  | 20:33872269-33872269  | C | A | EIF6  | c.G22T       | p.E8X        | stopgain               | 950  | 3    | 0.0031 |
| 98  | 3 | 17 | 1565295   | 1565295   | 17:1565295-1565295    | A | C | PRPF8 | c.T3927G     | p.S1309R     | nonsynonymous SNV      | 1711 | 7    | 0.0041 |
| 98  | 3 | 17 | 1565295   | 1565295   | 17:1565295-1565295    | A | C | PRPF8 | c.T3927G     | p.S1309R     | nonsynonymous SNV      | 1711 | 4    | 0.0023 |
| 98  | A | 7  | 66459281  | 66459281  | 7:66459281-66459281   | T | C | SBDS  | c.A176G      | p.N59S       | nonsynonymous SNV      | 422  | 3    | 0.0071 |
| 98  | B | 17 | 7578290   | 7578290   | 17:7578290-7578290    | C | T | TP53  | c.443-1G>A   |              | splicing               | 1003 | 3    | 0.003  |
| 98  | 1 | 17 | 7578404   | 7578404   | 17:7578404-7578404    | A | T | TP53  | c.T526A      | p.C176S      | nonsynonymous SNV      | 1724 | 3    | 0.0017 |
| 98  | B | 17 | 7578404   | 7578404   | 17:7578404-7578404    | A | T | TP53  | c.T526A      | p.C176S      | nonsynonymous SNV      | 1212 | 3    | 0.0025 |
| 98  | 1 | 17 | 7578496   | 7578496   | 17:7578496-7578496    | A | G | TP53  | c.T434C      | p.L145P      | nonsynonymous SNV      | 1635 | 18   | 0.0109 |
| 98  | 3 | 17 | 7578496   | 7578496   | 17:7578496-7578496    | A | G | TP53  | c.T434C      | p.L145P      | nonsynonymous SNV      | 1798 | 5    | 0.0028 |
| 98  | B | 17 | 7578496   | 7578496   | 17:7578496-7578496    | A | G | TP53  | c.T434C      | p.L145P      | nonsynonymous SNV      | 1114 | 5    | 0.0045 |
| 98  | C | 17 | 7578496   | 7578496   | 17:7578496-7578496    | A | G | TP53  | c.T434C      | p.L145P      | nonsynonymous SNV      | 1187 | 5    | 0.0042 |
| 98  | D | 17 | 7578496   | 7578496   | 17:7578496-7578496    | A | G | TP53  | c.T434C      | p.L145P      | nonsynonymous SNV      | 1053 | 7    | 0.0066 |
| 99  | A | 4  | 106197221 | 106197221 | 4:106197221-106197221 | C | T | TE12  | c.C5554T     | p.Q1852X     | stopgain               | 2091 | 11   | 0.0052 |
| 99  | A | 17 | 7577100   | 7577100   | 17:7577100-7577100    | T | C | TP53  | c.A838G      | p.R280G      | nonsynonymous SNV      | 1729 | 3    | 0.0017 |
| 99  | B | 17 | 7577100   | 7577100   | 17:7577100-7577100    | T | C | TP53  | c.A838G      | p.R280G      | nonsynonymous SNV      | 1334 | 4    | 0.003  |
| 99  | A | 17 | 7577533   | 7577533   | 17:7577533-7577533    | O | - | TP53  | c.746_748del | p.249_250del | nonframeshift deletion | 1410 | 3    | 0.0021 |
| 99  | A | 17 | 7577539   | 7577539   | 17:7577539-7577539    | G | A | TP53  | c.C742T      | p.R248W      | nonsynonymous SNV      | 1480 | 3    | 0.002  |
| 99  | A | 17 | 7578394   | 7578394   | 17:7578394-7578394    | T | C | TP53  | c.A536G      | p.H179R      | nonsynonymous SNV      | 1772 | 3    | 0.0017 |
| 99  | B | 17 | 7578394   | 7578394   | 17:7578394-7578394    | T | C | TP53  | c.A536G      | p.H179R      | nonsynonymous SNV      | 1314 | 6    | 0.0045 |
| 99  | B | 17 | 7578413   | 7578413   | 17:7578413-7578413    | C | T | TP53  | c.G517A      | p.V173M      | nonsynonymous SNV      | 1341 | 3    | 0.0022 |
| 101 | B | 20 | 33867478  | 33867478  | 20:33867478-33867478  | C | G | EIF6  | c.G562C      | p.G188R      | nonsynonymous SNV      | 1275 | 8    | 0.0062 |
| 101 | B | 20 | 33867498  | 33867498  | 20:33867498-33867498  | T | G | EIF6  | c.A542C      | p.N181T      | nonsynonymous SNV      | 1259 | 4    | 0.0032 |
| 101 | B | 20 | 33867505  | 33867505  | 20:33867505-33867505  | C | T | EIF6  | c.G535A      | p.V179M      | nonsynonymous SNV      | 1249 | 4    | 0.0032 |
| 101 | A | 20 | 33867510  | 33867510  | 20:33867510-33867510  | C | A | EIF6  | c.G530T      | p.G177V      | nonsynonymous SNV      | 1014 | 40   | 0.038  |
| 101 | B | 20 | 33867510  | 33867510  | 20:33867510-33867510  | C | A | EIF6  | c.G530T      | p.G177V      | nonsynonymous SNV      | 1137 | 83   | 0.068  |
| 101 | A | 20 | 33867535  | 33867535  | 20:33867535-33867535  | G | A | EIF6  | c.C505T      | p.R169X      | stopgain               | 900  | 25   | 0.027  |
| 101 | B | 20 | 33867535  | 33867535  | 20:33867535-33867535  | G | A | EIF6  | c.C505T      | p.R169X      | stopgain               | 995  | 26   | 0.0255 |
| 101 | B | 20 | 33867813  | 33867816  | 20:33867813-33867816  | O | - | EIF6  | c.418_421del | p.G140fs     | frameshift deletion    | 1295 | 4    | 0.0031 |
| 101 | B | 20 | 33867815  | 33867815  | 20:33867815-33867815  | C | T | EIF6  | c.G419A      | p.G140E      | nonsynonymous SNV      | 1296 | 3    | 0.0023 |
| 101 | B | 20 | 33868492  | 33868492  | 20:33868492-33868492  | C | T | EIF6  | c.G334A      | p.D112N      | nonsynonymous SNV      | 1223 | 9    | 0.0073 |
| 101 | A | 20 | 33871978  | 33871978  | 20:33871978-33871978  | C | T | EIF6  | c.312+1G>A   |              | splicing               | 732  | 43   | 0.0555 |
| 101 | B | 20 | 33871978  | 33871978  | 20:33871978-33871978  | C | T | EIF6  | c.312+1G>A   |              | splicing               | 846  | 54   | 0.06   |
| 101 | B | 20 | 33872250  | 33872250  | 20:33872250-33872250  | C | T | EIF6  | c.G41A       | p.G14D       | nonsynonymous SNV      | 1240 | 3    | 0.0024 |
| 101 | A | 20 | 33872283  | 33872283  | 20:33872283-33872283  | A | T | EIF6  | c.T8A        | p.V3D        | nonsynonymous SNV      | 812  | 4    | 0.0049 |
| 101 | B | 20 | 33872283  | 33872283  | 20:33872283-33872283  | A | T | EIF6  | c.T8A        | p.V3D        | nonsynonymous SNV      | 1011 | 5    | 0.0049 |
| 101 | A | 17 | 1565303   | 1565303   | 17:1565303-1565303    | T | C | PRPF8 | c.A3919G     | p.M1307V     | nonsynonymous SNV      | 877  | 6    | 0.0068 |
| 101 | B | 17 | 1565303   | 1565303   | 17:1565303-1565303    | T | C | PRPF8 | c.A3919G     | p.M1307V     | nonsynonymous SNV      | 1076 | 8    | 0.0074 |
| 101 | A | 17 | 7577143   | 7577143   | 17:7577143-7577143    | O | - | TP53  | c.793_795del | p.265_265del | nonframeshift deletion | 765  | 6    | 0.0078 |
| 101 | B | 17 | 7579463   | 7579463   | 17:7579463-7579463    | G | C | TP53  | c.C224G      | p.P75R       | nonsynonymous SNV      | 1318 | 3    | 0.0023 |
| 102 | A | 20 | 33867845  | 33867845  | 20:33867845-33867845  | C | T | EIF6  | c.G389A      | p.G130E      | nonsynonymous SNV      | 1933 | 28   | 0.0143 |
| 102 | A | 20 | 33868509  | 33868509  | 20:33868509-33868509  | C | T | EIF6  | c.A317G      | p.N106S      | nonsynonymous SNV      | 1845 | 6    | 0.0032 |
| 102 | A | 1  | 115258747 | 115258747 | 1:115258747-115258747 | C | T | NRAS  | c.G35A       | p.G12D       | nonsynonymous SNV      | 1042 | 585  | 0.3596 |
| 102 | Z | 1  | 115258747 | 115258747 | 1:115258747-115258747 | C | T | NRAS  | c.G35A       | p.G12D       | nonsynonymous SNV      | 356  | 258  | 0.4202 |
| 102 | A | 17 | 1565303   | 1565303   | 17:1565303-1565303    | T | C | PRPF8 | c.A3919G     | p.M1307V     | nonsynonymous SNV      | 1765 | 4    | 0.0023 |
| 102 | A | 17 | 7578532   | 7578532   | 17:7578532-7578532    | A | T | TP53  | c.T398A      | p.M133K      | nonsynonymous SNV      | 336  | 1085 | 0.7635 |
| 102 | Z | 17 | 7578532   | 7578532   | 17:7578532-7578532    | A | T | TP53  | c.T398A      | p.M133K      | nonsynonymous SNV      | 99   | 523  | 0.8408 |
| 106 | B | 20 | 33867001  | 33867001  | 20:33867001-33867001  | C | A | EIF6  | c.G680T      | p.X227L      | stoploss               | 1015 | 24   | 0.0231 |
| 106 | A | 20 | 33867001  | 33867001  | 20:33867001-33867001  | C | A | EIF6  | c.G680T      | p.X227L      | stoploss               | 845  | 19   | 0.022  |
| 106 | A | 20 | 33867410  | 33867410  | 20:33867410-33867410  | C | - | EIF6  | c.G30delT    | p.P210fs     | frameshift deletion    | 835  | 8    | 0.0095 |
| 106 | B | 20 | 33867410  | 33867410  | 20:33867410-33867410  | C | - | EIF6  | c.G30delT    | p.P210fs     | frameshift deletion    | 968  | 4    | 0.0041 |
| 106 | A | 20 | 33868628  | 33868628  | 20:33868628-33868628  | G | T | EIF6  | c.C198A      | p.N66K       | nonsynonymous SNV      | 607  | 5    | 0.0082 |
| 106 | B | 20 | 33868628  | 33868628  | 20:33868628-33868628  | G | T | EIF6  | c.C198A      | p.N66K       | nonsynonymous SNV      | 775  | 3    | 0.0039 |
| 106 | B | 20 | 33872002  | 33872002  | 20:33872002-33872002  | C | G | EIF6  | c.G289C      | p.A97P       | nonsynonymous SNV      | 890  | 8    | 0.0089 |
| 106 | A | 20 | 33872067  | 33872067  | 20:33872067-33872067  | G | C | EIF6  | c.C224G      | p.T75R       | nonsynonymous SNV      | 651  | 3    | 0.0046 |
| 106 | A | 20 | 33872182  | 33872182  | 20:33872182-33872182  | A | C | EIF6  | c.T109G      | p.C37G       | nonsynonymous SNV      | 751  | 3    | 0.004  |
| 106 | B | 20 | 33872182  | 33872182  | 20:33872182-33872182  | A | C | EIF6  | c.T109G      | p.C37G       | nonsynonymous SNV      | 847  | 5    | 0.0059 |
| 106 | A | 20 | 33872224  | 33872224  | 20:33872224-33872224  | A | - | EIF6  | c.67delT     | p.Y23fs      | frameshift deletion    | 767  | 10   | 0.0129 |
| 106 | B | 20 | 33872224  | 33872224  | 20:33872224-33872224  | A | - | EIF6  | c.67delT     | p.Y23fs      | frameshift deletion    | 940  | 13   | 0.0136 |
| 106 | B | 20 | 33872250  | 33872250  | 20:33872250-33872250  | C | T | EIF6  | c.G41A       | p.G14D       | nonsynonymous SNV      | 952  | 4    | 0.0042 |
| 106 | B | 20 | 33872266  | 33872266  | 20:33872266-33872266  | T | C | EIF6  | c.A25G       | p.N9D        | nonsynonymous SNV      | 902  | 4    | 0.0044 |
| 106 | A | 20 | 33872277  | 33872277  | 20:33872277-33872277  | G | T | EIF6  | c.C14A       | p.A5D        | nonsynonymous SNV      | 674  | 6    | 0.0088 |
| 106 | B | 20 | 33872277  | 33872277  | 20:33872277-33872277  | G | T | EIF6  | c.C14A       | p.A5D        | nonsynonymous SNV      | 835  | 4    | 0.0048 |
| 106 | A | 17 | 7577082   | 7577082   | 17:7577082-7577082    | C | T | TP53  | c.G856A      | p.E286K      | nonsynonymous SNV      | 864  | 3    | 0.0035 |
| 106 | B | 17 | 7577082   | 7577082   | 17:7577082-7577082    | C | T | TP53  | c.G856A      | p.E286K      | nonsynonymous SNV      | 1159 | 6    | 0.0052 |
| 106 | A | 17 | 7577094   | 7577094   | 17:7577094-7577094    | G | A | TP53  | c.C844T      | p.R282W      | nonsynonymous SNV      | 858  | 7    | 0.0081 |
| 106 | B | 17 | 7577094   | 7577094   | 17:7577094-7577094    | G | A | TP53  | c.C844T      | p.R282W      | nonsynonymous SNV      | 1143 | 10   | 0.0087 |
| 106 | A | 17 | 7578542   | 7578542   | 17:7578542-7578542    | G | A | TP53  | c.C388T      | p.L130F      | nonsynonymous SNV      | 709  | 5    | 0.007  |
| 106 | B | 17 | 7578542   | 7578542   | 17:7578542-7578542    | G | A | TP53  | c.C388T      | p.L130F      | nonsynonymous SNV      | 850  | 12   | 0.0139 |
| 107 | A | 20 | 33867468  | 33867468  | 20:33867468-33867468  | G | A | EIF6  | c.C572T      | p.T191I      | nonsynonymous SNV      | 1387 | 131  | 0.0863 |
| 107 | B | 20 | 33867468  | 33867468  | 20:33867468-33867468  | G | A | EIF6  | c.C572T      | p.T191I      | nonsynonymous SNV      | 983  | 5    | 0.0051 |
| 107 | B | 20 | 33867546  | 33867546  | 20:33867546-33867546  | C | T | EIF6  | c.G494A      | p.G165E      | nonsynonymous SNV      | 661  | 3    | 0.0045 |
| 107 | A | 2  | 209113113 | 2         |                       |   |   |       |              |              |                        |      |      |        |
