# Supplementary material for: Distinct genetic pathways define pre-malignant versus compensatory clonal hematopoiesis in Shwachman-Diamond syndrome
Source: PubMed Central journal article supplement (PMC7910481; doi:10.1038/s41467-021-21588-4), 2021-02-26
Supplement: 41467_2021_21588_MOESM2_ESM.pdf [file 41467_2021_21588_MOESM2_ESM.pdf]

## **Descriptions of Additional Supplementary Files**

### **Supplementary software 1**

**Description:** Rosetta scripts
